# Supplementary material for: Predictive Tool Use and Willingness for Surgery in Patients With Knee Osteoarthritis: A Randomized Clinical Trial
Source: PubMed Central journal article supplement (PMC10924247; doi:10.1001/jamanetworkopen.2024.0890), 2024-03-08
Supplement: jamanetwopen-e240890-s001.pdf [file jamanetwopen-e240890-s001.pdf]

1  
2 **Evaluating Willingness for Surgery Using the SMART**  
3 **Choice Tool to Predict Outcomes after Total Knee**  
4 **Arthroplasty: A Randomised Controlled Trial**

5  
6  
7 **“The SMART Choice Trial”**

8  
9 **Study Protocol**

10  
11 **Version 5.5**  
12 **Amended 19 July 2022**

13  
14  
15 **Confidential**

16  
17 This document is confidential and the property of The University of Melbourne, HCF  
18 Research Foundation, and St. Vincent’s Hospital, Melbourne. No part of it may be  
19 transmitted, reproduced, published, or used without prior written authorization from the  
20 institutions.

21  
22  
23 **Statement of Compliance**

24  
25 This document is a protocol for a clinical research study. The study will be conducted in  
26 compliance with all stipulations of this protocol, the conditions of ethics committee approval,  
27 the NHMRC National Statement on Ethical Conduct in Human Research (2018) and the Note  
28 for Guidance on Good Clinical Practice (CPMP/ICH-135/95).

29  
30  
31 *NB: This tool was previously known as “PROTO-KNEE” and has now been rebranded*  
32 *SMART Choice (Knee) as of 1 February 2022.*  
33

34  
35  
36

## ABBREVIATIONS

| <b>Abbreviation</b> | <b>Definition</b>                                                                    |
|---------------------|--------------------------------------------------------------------------------------|
| AE                  | Adverse event                                                                        |
| ANZCTR              | Australian New Zealand Clinical Trials Registry                                      |
| CF                  | Consent form                                                                         |
| CI                  | Co-Investigator                                                                      |
| CONSORT             | Consolidation Standards of Reporting Trials                                          |
| CRF                 | Case report form                                                                     |
| EPR                 | Electronic patient records                                                           |
| GP                  | General practitioner                                                                 |
| HCF                 | Hospitals Contribution Fund (Health insurance company)                               |
| K-DQI               | Decision Quality Instrument (Knee Arthritis specific)                                |
| MCID                | Minimal clinically important difference                                              |
| MRO                 | Medical records online                                                               |
| NSAID               | Non-steroidal anti-inflammatory drug                                                 |
| OA                  | Osteoarthritis                                                                       |
| PAS                 | Patient administration systems                                                       |
| PFA                 | Patellofemoral arthroplasty                                                          |
| PI                  | Principal Investigator                                                               |
| PIS                 | Patient information sheet                                                            |
| PROM                | Patient reported outcome measure                                                     |
| SAE                 | Serious adverse event                                                                |
| SAGER               | Sex and Gender Equity in Research                                                    |
| SF6D                | Short form survey (6 dimensions)                                                     |
| SMART               | St. Vincent's Melbourne Arthroplasty Outcomes (Registry)                             |
| SPIRIT              | Standard Protocol Items: Recommendations for Interventional Trials                   |
| SUSAR               | Suspected unexpected serious adverse reaction                                        |
| SVHA                | St. Vincent's Hospitals, Australia                                                   |
| SVHM                | St. Vincent's Hospital, Melbourne                                                    |
| TAU                 | Treatment as usual                                                                   |
| TKA                 | Total knee arthroplasty (= total knee replacement)                                   |
| TRIPOD              | Transparent reporting of a multivariate prediction model for prognosis or diagnosis. |
| UKA                 | Unicondylar knee arthroplasty                                                        |
| VR-12               | Veterans RAND 12 Item Health Survey                                                  |
| WOMAC               | Western Ontario and McMaster Universities Osteoarthritis Index                       |

37

38 **1. INVESTIGATORS AND FACILITIES**  
39

40  
41 *1.1. Study Locations*  
42

43 This study will be conducted primarily online with participants recruited from two cohorts:

- 44 - Customers of HCF  
45 - Patients at St. Vincent's Hospital, Melbourne (SVHM)  
46

47 The research team will be based at:

- 48 - Department of Surgery  
49 Faculty of Medical, Dental and Health Sciences  
50 The University of Melbourne  
51 - Department of Orthopaedic Surgery  
52 St. Vincent's Hospital, Melbourne.  
53

54 *1.2. Study Management*  
55

56 *1.2.1. Principal Investigator*  
57

58 Dr. Chris Schilling  
59 Senior Research Fellow and Health Economist  
60 [Chris.schilling@unimelb.edu.au](mailto:Chris.schilling@unimelb.edu.au)  
61

62 *1.2.2. Project Team*  
63

64 Contact information for research team members are available on request.  
65

66 Co-investigators:

67 Dr. Yushy Zhou  
68 A/Prof. Michelle Dowsey  
69 Prof. Peter Choong  
70 Dr. Samantha Bunzli  
71

72 Project Officer:

73 Ms. Lauren Patten  
74

75 Clinical Trials Co-ordinator

76 Ms. Claire Weeden  
77

78 *1.2.3. Statistician*  
79

80 Dr. Tim Spelman  
81 Senior Biostatistician  
82 [Tim@burnet.edu.au](mailto:Tim@burnet.edu.au)  
83

84 *1.3. Sponsor / Funding*  
85

86 This study is funded through a research grant by the HCF Research Foundation (grant  
87 number N/A).

88 **2. PROTOCOL SYNOPSIS**

89  
90

91 *Intervention*

92

93 The *SMART Choice* is a prognostic tool developed to predict patient satisfaction after total  
94 knee arthroplasty (TKA). The tool predicts outcome in the form of a likelihood score for  
95 satisfaction after TKA. The tool is patient-focused meaning it can be used without the input  
96 of clinicians.

97

98 *Objectives*

99

100 To evaluate the effect of the *SMART Choice* prognostic tool with regards to patient  
101 willingness for surgery in TKA.

102

103 *Design*

104

105 Prospective, single-blinded, randomised controlled trial.

106

107 *Population*

108

109 People who are suffering from knee OA and considering TKA are eligible for the study.  
110 Participants will be recruited from two sources: HCF and SVHM.

111

112 *Number of Subjects*

113

114 Based on our sample size calculations, approximately 400 participants will be required for  
115 our study. Participants will be randomly allocated 1:1 into two groups: intervention  
116 (prognostic tool use) group and treatment as usual (TAU) group.

117

118 *Outcomes*

119

120 The primary outcome of the study is willingness for TKA surgery. Secondary outcomes are  
121 optimal timing for tool use and accuracy of predicted outcomes. A nested qualitative study  
122 will evaluate the clinical utility of the tool from a consumer perspective. An economic  
123 analysis will evaluate the cost benefit of the tool.

124

125 *Follow-up*

126

127 Participants will be followed up at six weeks, three months, and six months after their initial  
128 assessment. Long term follow-up of participants will be investigated as a linked study to the  
129 Australian Joint Registry and the St. Vincent's Melbourne Arthroplasty Outcomes (SMART)  
130 Registry.

131

132 *Study Duration*

133

134 The study duration is estimated to be 21 months to completion from first enrolment.

135

### 3. INTRODUCTION AND BACKGROUND

#### 3.1. Terminology

In this study protocol, the term “prognostic tool” refers to the interface (e.g. website or mobile app) that patients interact with to predict outcomes. In contrast, the term “predictive model” refers to the statistical model(s) and/or machine learning algorithm(s) that the prognostic tool uses to calculate predictive outcomes.

#### 3.2. Background

Knee osteoarthritis (OA) is a progressive and debilitating condition for sufferers. Pain and stiffness are common presenting complaints. Without adequate intervention, functional decline and even complete loss of independence can occur.<sup>10</sup> Lifestyle modification, analgesia and physiotherapy comprise the core of non-operative management.<sup>31</sup> In certain situations, intra-articular injections may delay the need for surgery.<sup>23,29</sup> Failing non-operative management, the definitive treatment option for knee OA is TKA.<sup>24</sup>

Based on registry studies, TKA is generally regarded as a successful procedure.<sup>4,11</sup> The risk of adverse event associated with the surgery is relatively low and the probability of improving symptoms is relatively high.<sup>13,20</sup> However, recent studies have reported that up to 20 percent of patients remain unsatisfied after TKA.<sup>1</sup> For these patients, ongoing symptoms from their TKA severely impacts their quality of life.<sup>9,32</sup> With a current trend towards more arthroplasty surgery globally, the social and economic impact of TKA dissatisfaction is a fast growing problem.<sup>21</sup>

To address this issue, solutions need to arise from multiple fronts. Improvement in surgical technique and implant design seem to be the most obvious path forward. However, substantial progress has already been made from pioneers of the past. The trajectory of progress from technique and implant design alone is reaching a plateau.<sup>12,25</sup> An alternative solution would be a completely new treatment for knee OA; a solution that addresses both the symptoms and natural history of the disease. Work is underway to experiment with biologic agents aimed at regenerating cartilage and bone.<sup>15,17,19,28</sup> However, this process is expensive and time consuming without any guarantee of success. Research must therefore explore complementary pathways to find solutions for TKA dissatisfaction.

One of these pathways is through improvement of patient specific factors. The goal here is to optimise patients to become excellent surgical candidates. Prognostic tools fit into this area of research. These are tools developed to predict surgical outcomes. This is clinically useful in two ways. First, if poor outcomes can be predicted before surgery, then patients can be stratified into groups based on risk. For high-risk patients, resources can be set aside to improve modifiable risk factors. This will optimise the patients for surgery. Secondly, prognostic tools can manage patient expectations through informed decision making. A patient who understands their potential outcomes may regress their expectations towards what is realistic for their circumstances. This is based on the understanding that a major driver of dissatisfaction is the imbalance between expected and actual outcomes.<sup>30</sup> The hope is that prognostic tools can better align these two perceptions to improve patient satisfaction and influence patient decision making about surgery for the better.

185 *SMART Choice* is a patient focused prognostic tool that predicts outcomes after TKA. The  
186 term “patient focused” means that a patient can use the tool by themselves before seeing a  
187 clinician. The tool was developed using data from the SMART Registry– an extensive  
188 arthroplasty registry with over 10,000 patients and more than 20 years follow up time.<sup>14</sup>  
189 *SMART Choice* uses the SMART Registry data to provide patients with a likelihood score  
190 for a satisfactory outcome after TKA. This benefits patient care through two pathways; 1)  
191 improves informed decision making for the patient, and 2) manages patient expectations in  
192 preparation for TKA.

193

### 194 *3.3. Rationale and Hypotheses*

195

196 This study forms part of a wider research project investigating improvement in patient  
197 selection for TKA. Prognostic tools fit into this research scope because they can stratify  
198 patients based on risk and predicted outcomes. Patients deemed high risk of unsatisfactory  
199 outcome can be identified before surgery. Modifiable risk factors can be optimised in these  
200 patients to improve outcomes.

201

202 Additionally, patients who have knowledge of their predicted outcomes are better informed to  
203 make decisions about surgery. Our hypothesis is that prognostic tools in this context can  
204 positively influence patient decision making for TKA. We will measure patient decision  
205 making through willingness for surgery scales. For patients who are identified as high risk,  
206 we hypothesise that a significant proportion of patients will reconsider their willingness for  
207 surgery and/or make lifestyle changes to reduce their modifiable risk factors. Furthermore,  
208 we expect early intervention with the prognostic tool (before seeing an Orthopaedic Surgeon)  
209 to have a larger impact on willingness for surgery than later in the patient journey (after  
210 seeing an Orthopaedic Surgeon). The rationale behind this hypothesis is that with progression  
211 along the TKA journey, patients will likely have a stronger perception of investment in the  
212 process. Patients are therefore less likely to abandon this perceived investment by declining  
213 surgery later in the TKA journey.

214

215 Although many predictive tools have been developed for TKA and other arthroplasty  
216 procedures, very few have been implemented in clinical practice. A possible explanation for  
217 this observation is the paucity of clinical trials that have evaluated prognostic tools for  
218 arthroplasty. To our knowledge, this will be the first randomised controlled trial (RCT) that  
219 will study the effect of prognostic tool use on willingness for surgery in TKA. Willingness  
220 for surgery will be used as a proxy measure to understand how prognostic tools can influence  
221 patient decision making regarding TKA.

222

### 223 *3.4. Research Questions*

224

225 The overarching research question is “how can we improve patient selection for TKA?” With  
226 respect to this randomised controlled trial, the primary question we are investigating is “what  
227 are the effects of prognostic tool use on patient willingness for TKA surgery?”

228

229 **4. STUDY OBJECTIVES**

230

231

232 *4.1. Primary Objective*

233

234 The primary objective of this study is to evaluate the impact of the *SMART Choice* tool use  
235 on willingness for TKA surgery for patients with knee OA. This is in comparison with  
236 standard care alone.

237

238 *4.2. Secondary Objectives*

239

240 The secondary objectives of this study are:

241 ● To determine the optimal timing for prognostic tool use in a patient's TKA journey to  
242 maximise effect on willingness for surgery.

243 ● To assess the accuracy of *SMART Choice* predicted outcomes compared with actual  
244 outcomes in patients who proceeded with surgery (through comparison of patient  
245 reported outcome measures).

246 ● To determine if there are differences in the effectiveness of *SMART Choice* when  
247 used in sub-populations such as sex, gender, and ethnicity.

248 ● To evaluate the economic benefit of using *SMART Choice*.

249

250 Long term (greater than 5 years) follow-up of patients will occur through linkage to the  
251 SMART and Australian Joint Registries. This will be registered as a separate study later in  
252 the overall project.

253

254 **5. STUDY DESIGN**

255

256

257 *5.1. Study Methodology Overview*

258

259 This is a prospective, assessor-blinded, superiority randomised controlled trial. The trial will  
260 be registered with the Australian New Zealand Clinical Trials Registry (ANZCTR).

261 Reporting will be in accordance with the CONSORT Statement.<sup>22</sup> The trial protocol will be  
262 published in line with SPIRIT<sup>5</sup> (clinical trial), and SAGER<sup>7</sup> (sex and gender equity)  
263 guidelines.

264

265 People with knee OA who are considering TKA will be selected for the study. Screening for  
266 potential participants will occur from two sources; 1) customers of HCF who are identified as  
267 having knee OA and considering TKA, and 2) patients who are referred to SVHM  
268 Orthopaedic Outpatients Clinic for consideration of TKA, or on the waiting list for re-review  
269 in clinic, or on the waiting list for unilateral TKA. Additional participants outside of these  
270 two sources will also be considered, for example, when participants invite friends or family to  
271 participate in the study. Participants must be considering TKA surgery and provide informed  
272 consent to participate in the study.

273

274 Participants will be randomised into two equal groups:

275 ● Intervention (prognostic tool)

276 ● Treatment as usual (TAU)

277 Definitions for each group are detailed in section 6.

278

279 The TAU group is the control group of the study. This represents the care a patient would  
280 receive if they were not part of this study and seeking treatment for their knee OA through  
281 public channels within the Australian health system.

282

283 Due to the nature of the study, only assessor blinding will occur. For the purposes of the  
284 study, the research team will be separated into two groups by their roles. There will be  
285 research assistants whose primary role is to manage the recruitment and data entry aspects of  
286 the study. There will also be investigators who will perform the data analysis of the study.

287 We do not intend for crossover to occur between these roles. Consequently, research  
288 assistants will be able to perform their duties unblinded whilst investigators will remain  
289 blinded to participant identity and allocation groups during the analysis phase. This blinding  
290 strategy prevents bias from being introduced by investigators when interpreting the results of  
291 the study.

292

293 Blinding of participants would be a challenge logistically. Therefore, the study will instead  
294 utilise a limited disclosure method after allocation. Participants will be blinded from what the  
295 specific intervention in each arm of the study entails. For surgeons who are reviewing  
296 patients in the clinic, they will be blinded to the allocation grouping and have no role in  
297 outcome ascertainment. The statistician will be blinded to both arms of the study.

298

299 The primary outcome will be the effect of prognostic tool use on participant willingness for  
300 TKA surgery. Secondary outcomes will be optimal timing for prognostic tool use, differences  
301 in tool effectiveness amongst sub-populations, and accuracy of prognostic tool prediction (in  
302 patients who undergo TKA) with respect to satisfactory surgery outcome.

303



304 To measure the outcomes of interest, the following data will be collected:

- 305 ● Willingness for surgery question: “Are your knee symptoms so bothersome that you  
306 would be willing to undergo surgery if medically fit to do so? (Yes/No).”<sup>22</sup>
  - 307 ○ If yes, “In what time frame are willing to have surgery?” [Time in months].
- 308 ● Proceeding with TKA: “Have you already received a TKA for your knee symptoms?  
309 (Yes/No).”
- 310 ● PROM tools:
  - 311 ○ Veterans RAND 12 Item Health Survey Score (VR-12)
  - 312 ○ EQ-5D-3L Questionnaire

313 PROM data will be captured for the TKA even if the patient has proceeded with TKA during  
314 the duration of the study. See section 9.4 and 9.5 for more details.

315  
316 Participants will be followed up for six months. Data will be captured at four timepoints  
317 throughout the study:

- 318 ● Initial assessment at time of recruitment
- 319 ● 6 weeks after initial assessment
- 320 ● 12 weeks after initial assessment
- 321 ● 6 months after initial assessment

322 See section 8 for further details about assessments and follow up.

323

### 324 5.2. Number of Subjects

325

326 A power analysis calculation was performed to estimate the sample size for this study. We  
327 used baseline willingness for surgery in TKA as published by Bendich et al and Dell’Isola et  
328 al.<sup>2,8</sup> Methods described in *Fundamentals of Biostatistics 7<sup>th</sup> Edition* were used for power  
329 analysis.<sup>26</sup> Alpha was set at 0.05 and power was set at 80%. From the two comparison  
330 studies, a sample size range of 240-360 participants were needed for the study. Additional  
331 studies were used to benchmark our sample size calculations to ensure consistency.<sup>6,18</sup> To  
332 account for lost to follow up, 5% inflation was included in our final sample size calculation.  
333 This buffer is a conservative estimate given the SMART Registry achieves 98% survey  
334 follow-up at one year.<sup>14</sup> Our final sample size estimate was 400 participants. The sample size  
335 calculated is a feasible number to recruit because SVHM perform approximately 300 TKA  
336 each year and HCF currently have approximately 50,000 members with knee OA. We will  
337 aim to recruit 200 patients from the SVHM cohort and approach a random pool of all patients  
338 with knee OA in the HCF database. Based on these calculations, we estimate that 6 months  
339 will be a sufficient time period for recruitment to be completed. In the event that disruptions,  
340 including but not limited to COVID-19, negatively affects or delays recruitment, an interim  
341 analysis will be performed at 200 participants. The purpose of the interim analysis will be to  
342 evaluate the feasibility and necessity of recruitment numbers. See section 7.1 for further  
343 details.

344

### 345 5.3. Expected Duration of Study

346

347 The study is expected to be completed within 21 months (Fig. 1). This timeline is divided into  
348 three phases:

- 349 ● Phase 1 – study planning, logistics, setting up the appropriate infrastructure to ensure  
350 all relevant data can be captured.
- 351 ● Phase 2 – recruitment of patients will occur sequentially alongside follow up of  
352 patients who have been recruited earlier in the study.

353  
354  
355

- Phase 3 – final follow up of the patients recruited later in the study, data analysis, and preparing the findings for dissemination in journal publications and conferences.

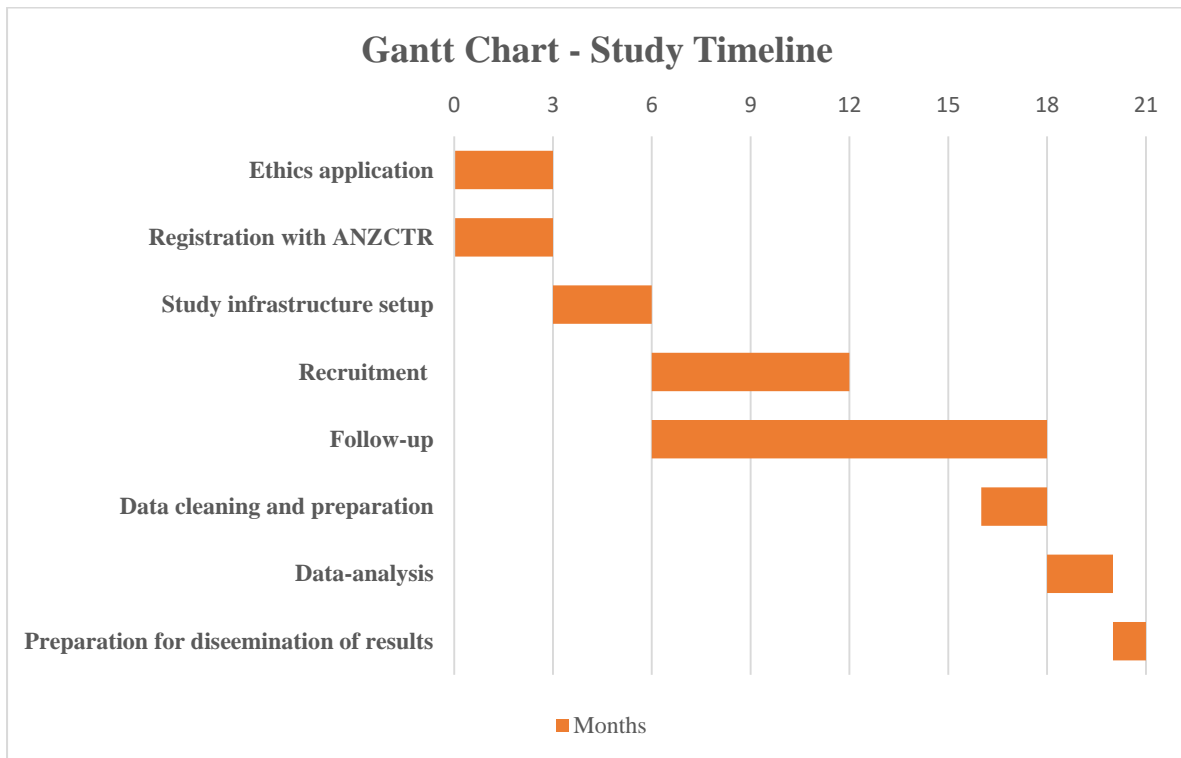

356  
357  
358  
359

Figure 1. Gantt Chart detailing the timeline of the study.

360 6. STUDY TREATMENTS

361

362

363 6.1. *Treatment Arms*

364

365 To meet the primary and secondary objectives of this study, participants will be randomised  
366 into two equal groups.

367 • **Intervention group** – this group is defined as using the *SMART Choice* tool in  
368 addition to standard care for TKA pathway.

369 • **Treatment as usual (TAU) group** – this group is defined by the absence of  
370 prognostic tool use and only receiving usual care for patients on the TKA pathway.

371

372 The purpose for randomising participants into intervention and TAU groups is to  
373 comparatively measure the outcomes attributed to prognostic tool use. Therefore, the  
374 intervention in this study is the use of the prognostic tool (*SMART Choice*). It is important to  
375 note that intervention groups receive prognostic tool use *in addition* to standard care. In other  
376 words, no care is withheld in the intervention group. By contrast, the TAU group receives no  
377 additional intervention from the study.

378

379 Sub-analysis will be used to measure secondary outcomes. In particular, optimal timing of  
380 prognostic tool use on willingness for surgery will be measured. Participants will be required  
381 to indicate their position in the TKA journey at the beginning of the study (see section 10).

382 Time to appointment with an Orthopaedic Surgeon will be used as the reference point.

383 Participants who have not seen an Orthopaedic Surgeon and do not have an appointment to  
384 see an Orthopaedic Surgeon for at least 6 weeks are considered early in the TKA journey.

385 Participants who are due to see an Orthopaedic Surgeon within the next 6 weeks are  
386 considered in the middle of the TKA journey. Finally, participants who have already seen an  
387 Orthopaedic Surgeon are considered late in the TKA journey.

388

389 Our hypothesis is that use of the prognostic tool earlier in the TKA patient journey will lead  
390 to larger influences on willingness for surgery. The major reasoning behind this hypothesis is  
391 because the participants who are later in the TKA journey may feel more invested to continue  
392 with the process and undergo TKA despite risks of unsatisfactory outcome.

393

394 6.2. *Predictive Model Development*

395

396 The SMART Registry will be used as the primary database to build the predictive model. A  
397 combination of literature review and clinical judgement will form the basis for predictor  
398 selection. All predictors are required to be patient-specific – meaning the patient can input  
399 these variables without clinician knowledge such as radiographic assessment of disease.

400 Univariate and multivariate regression analysis will provide statistical evaluation of  
401 correlation between predictors and outcomes. Multiple predictive models using regression  
402 modelling and machine learning algorithms will be constructed and compared. 10-fold cross  
403 validation technique will be used to internally validate the model thereby reducing bias and  
404 overfitting of data. The outcome of interest for the model will be utility score improvement  
405 based on SF6D. Minimal clinically important difference (MCID) will be used to assess the  
406 threshold of PROM score improvement as satisfactory outcome. A decision curve analysis  
407 may be performed to assess the clinical utility of the final model. Furthermore, alternate  
408 models investigating hip arthroplasty may also be developed for comparison. The model

409 development process will be reported using TRIPOD guidelines; Transparent reporting of a  
410 multivariate prediction model for prognosis or diagnosis.

411

412 The predictive model will be housed as a patient-focused prognostic tool on two user  
413 platforms – website for computer and website optimised for mobile/tablet devices. The  
414 prognostic tool can be used once by participants in the intervention group. For participants in  
415 the TAU group, the prognostic tool will not be available for use until after the study ends. At  
416 the conclusion of the study, the prognostic tool will be available for all participants to use  
417 freely.

418

#### 419 *6.2.1 Crossover and Contamination Policy*

420

421 For the duration of the study, the *SMART Choice* tool will not be live and will only be able to  
422 be accessed through direct links to a secure platform. This will prevent patients in the TAU  
423 group from accessing the tool during the study and causing crossover contamination.

424

425 Alternative prognostic tools for TKA are already available freely on the internet.<sup>16</sup> However,  
426 with limited disclosure – the study will be framed as a self-assessment and education  
427 intervention. This will prevent participants in the TAU group from actively seeking out  
428 alternative prognostic tools for use. If a participant in the TAU uses a prognostic tool during  
429 the study, they will not be excluded. This reflects the pragmatic nature of the study because  
430 alternative prognostic tools are already freely available for general use.

431

432

433

434 **7. SUBJECT ENROLLMENT AND RANDOMISATION**

435

436

437 *7.1. Recruitment*

438

439 Participants will be recruited from two sources:

- 440 ● HCF client database who have identified patients with knee OA and considering TKA
- 441 ● SVHM Orthopaedic Outpatient Clinic patients who have presented, been booked, or
- 442 referred for new appointments to discuss TKA; or are on the waitlist for re-review in
- 443 clinic, or are on the surgical waitlist for TKA.

444 *NB: Additional participants recruited outside of these sources will be also considered in*

445 *circumstances such as when participants refer friends or family to the study. For these*

446 *participants, ethical oversight will be held by the University of Melbourne Ethics*

447 *Committee.*

448

449 Based on our sample size calculation, we will need approximately 400 patients in total for the

450 study to achieve our primary objective. As already described in section 5, we will approach

451 200 patients in the SVHM source and a random pool of all HCF members with knee OA

452 considering TKA. This strategy was deemed the most feasible when balancing the need to

453 recruit enough participants within a reasonable allocated timeframe. As a result, there may be

454 an over-recruitment of participants, from the HCF source.

455

456 From the HCF source, potential participants will be recruited from two major outlets. The

457 first will be a news article published in the HCF internal magazine overviewing our trial. The

458 article will provide potential participants to contact us to express their interest in participating

459 in the trial. The second will be the advertisement of the trial recruitment on the HCF

460 HealthShare platform. This is an internal HCF platform where customers can access medical

461 information, including information about how to participate in our trial. From HealthShare,

462 participants can contact us to express their interest in participating in the trial. All participants

463 from HCF who have expressed their interest will be emailed a link to our study website for

464 participation in the trial.

465

466 For the SVHM source, potential participants will be selected from monthly Orthopaedic

467 Outpatient Clinic lists for new appointments. On the day of their clinic, research staff will

468 approach potential participants before or after their appointment to consent for the study. An

469 iPad will be available to perform the initial screening and baseline information for the study.

470 In the event that there is an over-recruitment from the HCF cohort, the number of participants

471 recruited from SVHM can be reduced to meet our total sample size calculation. In addition,

472 patients who have been are awaiting FSA, or have been reviewed and are awaiting further

473 review, or have been placed on the surgical waitlist for TKA will be approached for

474 recruitment. Potential participants will receive a phone call from a member of the study team

475 to discuss the study and collect contact details including email to store on a spreadsheet

476 housed on SVHM servers. Participants will be emailed a copy of the PICF and will be asked

477 to respond with “I agree” or similar, to indicate they have read the PICF and agree to

478 participate in the study. Subsequently, the participant will be sent a username and password

479 to access the study website. Please note that for patients who access the study website from

480 the SVHM cohort, no identifiable information will be captured by the website. Instead, a

481 study identifier number will be provided that will match the patient contact details housed on

482 the SVHM spreadsheet.

483

484 If the participant is allocated to the intervention group, they will be directed to undertake a  
485 baseline questionnaire, willingness for surgery assessment, and PROM scores. Immediately  
486 after, they will be asked to use the prognostic tool. The next assessment will then be in 6  
487 weeks' time.

488  
489 If the patient is allocated to the TAU group, they will be directed to undertake a baseline  
490 questionnaire, willingness for surgery assessment, and PROM scores. The next assessment  
491 will also be in 6 weeks' time. Section 10 details the workflow of the study in further detail.  
492

493 The consent form will describe the purpose of the study, the procedures to be followed, and  
494 the risks and benefits of participation. A research team member will be available via an on-  
495 call research phone (the contact number will be provided) to discuss the study and consent  
496 process in further detail.  
497

498 In the event a potential participant declines our invitation for the study, this will be  
499 documented on a recruitment spreadsheet. The patient will be asked to provide a reason for  
500 their decline, however, providing this information will be on a voluntary basis. The  
501 proportion of patients who decline invitation to the study will be reported in the final study  
502 analysis. Furthermore, in the event a participant starts the study but does not complete this,  
503 we will contact the participant via email or phone to clarify the intentions of the participant.  
504

505 The recruitment phase of the study will end on an agreed date as determined by the research  
506 team. This will be dependent on the final sample size required. We will perform an interim  
507 analysis of the study when we recruit half of the intended sample size. As the sample size  
508 calculation was an approximation based on previous results, the sample size range may be as  
509 low as 240 (total) up to 400 (total). If the interim analysis demonstrates statistical  
510 significance in sample size, then recruitment will cease. If the interim analysis does not  
511 demonstrate statistical significance, then the trial will aim for the maximum sample size of  
512 400 (total) but will communicate a firm end date for recruitment. The purpose for  
513 documenting a firm end date for recruitment is to prevent ongoing replacement of  
514 participants in the event of high lost to follow-up cases. For further details, see Section 7.5.3.  
515

## 516 *7.2. Eligibility Criteria*

### 517 *7.2.1. Inclusion Criteria*

518  
519 Inclusion criteria will select for the following participants:

- 520 ● Diagnosed with knee OA and are considering primary unilateral TKA
- 521 ● Have already trialled non-operative management for their knee symptoms (see  
522 Section 5.1)
- 523 ● Are willing and able to use web or mobile phone based prognostic tool interfaces
- 524 ● Are able to provide informed consent to participate and available to be followed up  
525 for the duration of the study  
526

### 527 *7.2.2. Exclusion Criteria*

528  
529 Exclusion criteria will select out the following participants:

- 530 ● Source of knee symptoms is considered to be from any cause other than knee OA e.g.  
531 rheumatoid arthritis, hip osteoarthritis, referred lower back pain etc.  
532

- 533 ● Are considering bilateral TKA, revision TKA, unicompartmental knee arthroplasty (UKA),
- 534 or patellofemoral arthroplasty (PFA)
- 535 ● TKA on the contralateral side
- 536 ● Significant bilateral knee symptoms
- 537 ● Patients younger than 45 years

538

### 539 *7.2.3. Eligibility Screening*

540

541 Participants will be screened for eligibility based on the above criteria. The screening  
542 questionnaire will contain the following questions:

- 543 ● Have you been diagnosed with knee OA?
  - 544 ○ If no, patient will be excluded.
- 545 ● Which knee is most affected by your symptoms?
  - 546 ○ Left or right.
- 547 ● Have you already had a knee replacement on your affected knee?
  - 548 ○ If yes, patient will be excluded.
- 549 ● Have you trialed non-operative treatment for your affected knee, such as pain relief  
550 medication, lifestyle changes, or physiotherapy **within the last 12 months**?
  - 551 ○ If no, patient will be excluded.

552

553 Other minor eligibility criteria such as previous septic arthritis will be noted on the PIS.

554

### 555 *7.3. Randomisation Procedures*

556

557 Participants will be randomly assigned to receive the prognostic tool use in addition to  
558 standard care, or TAU. Simple randomisation of individuals will occur. Equal numbers of  
559 participants will be allocated to each group of the study. The allocation process will be built  
560 into the research platform that will be provided to potential participants during recruitment  
561 (see section 10).

562

### 563 *7.4. Study Blinding*

564

565 Due to the nature of the study, participants will remain unblinded from their allocation group.  
566 However, limited disclosure of allocation groups will be applied to prevent participants who  
567 are allocated TAU from pro-actively seeking out online prognostic tools to use. Participants  
568 will be followed up using the automated software, REDCap (Vanderbilt University,  
569 Nashville, TN, USA), which can conceal allocation groups of the participants to the  
570 investigators. Follow up queries from participants that require direct communication will be  
571 addressed at first instance by a research assistant.

572

573 Investigators (excluding research assistants who will not be involved in data analysis) will  
574 remain blinded to the allocation group and identity of patients until after final data analysis is  
575 performed. Surgeons will be blinded to the allocation group of their patients and will have not  
576 influence on the outcome of allocation or intervention.

577

### 578 *7.5. Subject Withdrawal*

579

#### 580 *7.5.1. Reasons for Withdrawal*

581

582 The investigator may withdraw a patient from the study treatment and follow-up procedures  
583 if the participant:

- 584 • Experiences a serious or intolerable adverse event that may impact their ability to  
585 participate in the study independently
- 586 • Develops, during the course of the study, symptoms or conditions listed in the  
587 exclusion criteria
- 588 • Is in the TAU group and uses any prognostic tool for TKA during the course of the  
589 study
- 590 • Requires early discontinuation for any reason

591  
592 The investigators will also withdraw all participants from the study treatment if the study is  
593 terminated. Participants are free to withdraw from the study at any time upon their request or  
594 the request of their legally acceptable representative.

595

#### 596 *7.5.2. Handling of Withdrawals and Losses to Follow-up*

597

598 If a participant withdraws from the study, the reasons for withdrawal shall be recorded on a  
599 recruitment spreadsheet. Whenever possible, data already captured about that participant will  
600 be retained for analysis. Participants who do not formally withdraw from the study but fail to  
601 respond to study assessments will be contacted by the research team to redirect compliance  
602 with the protocol. This will consist of two documented phone calls and a letter/email follow  
603 up. If these contact attempts are unsuccessful, the participant will be deemed lost to follow-  
604 up.

605

#### 606 *7.5.3. Replacements*

607

608 Participants who have been lost to follow-up or discontinued from the study may be replaced  
609 up until the agreed end date for recruitment. This date will be set at least 3 months prior to the  
610 end date as agreed by the research team. Lost to follow-up cases that occur after the  
611 recruitment phase cannot be replaced and will be noted in the final analysis of data.

612

#### 613 *7.6. Trial Closures*

614

615 A participant is considered to have completed the trial if they have completed all phases of  
616 the trial including the last assessment as shown in the Schedule of Assessments (see section  
617 8).

618

619



620  
621  
622  
623  
624

## 8. STUDY VISITS, PROCEDURES AND ASSESSMENTS SCHEDULE

### 8.1 Schedule of Assessments (SoA)

| TIME POINT*                      | SCHEDULE OF ASSESSMENTS |                            |                 |       |       |       |           |
|----------------------------------|-------------------------|----------------------------|-----------------|-------|-------|-------|-----------|
|                                  | Enrolment               | Allocation to intervention | Post-allocation |       |       |       | Close-out |
|                                  | $t_x$                   | $t_0$                      | $t_1$           | $t_2$ | $t_3$ | $t_4$ | $t_y$     |
| <b>ENROLMENT:</b>                |                         |                            |                 |       |       |       |           |
| Eligibility screen               | X                       |                            |                 |       |       |       |           |
| Informed consent                 | X                       |                            |                 |       |       |       |           |
| Allocation to intervention       |                         | X                          |                 |       |       |       |           |
| <b>ALLOCATION GROUPS:</b>        |                         |                            |                 |       |       |       |           |
| Intervention group (I)           |                         | X                          |                 |       |       |       |           |
| Treatment as usual group (TAU)   |                         | X                          |                 |       |       |       |           |
| <b>INTERVENTION:</b>             |                         |                            |                 |       |       |       |           |
| Prognostic Tool Use              |                         |                            | I               |       |       |       |           |
| <b>ASSESSMENTS:</b>              |                         |                            |                 |       |       |       |           |
| Baseline questionnaire**         |                         | X                          |                 |       |       |       |           |
| Willingness for surgery^         |                         | X                          |                 | X     | X     | X     | X         |
| Already proceeded with surgery^^ |                         |                            |                 | X     | X     | X     | X         |
| PROMs^^^                         |                         | X                          |                 | X     | X     | X     | X         |
| Qualitative questionnaires #     |                         |                            |                 |       |       | X     | X         |

625  
626  
627  
628  
629

### 8.2 Definitions for SoA

| Terms                                                                                                                               | Definitions                                                                                                                                                                                                                                               |
|-------------------------------------------------------------------------------------------------------------------------------------|-----------------------------------------------------------------------------------------------------------------------------------------------------------------------------------------------------------------------------------------------------------|
| * Time Point                                                                                                                        | $t_x$ Time at initial contact via email with PIS, CF, and eligibility screen. If a patient is eligible and consents, allocation will immediately follow this time.                                                                                        |
|                                                                                                                                     | $t_0$ Time at allocation with initial concurrent assessments.                                                                                                                                                                                             |
|                                                                                                                                     | $t_1$ Immediately after allocation, for prognostic tool use in TAU group.                                                                                                                                                                                 |
|                                                                                                                                     | $t_2$ 6 weeks after initial assessment ( $t_0$ )                                                                                                                                                                                                          |
|                                                                                                                                     | $t_3$ 12 weeks after initial assessment ( $t_0$ )                                                                                                                                                                                                         |
|                                                                                                                                     | $t_4$ 6 months after initial assessment ( $t_0$ )                                                                                                                                                                                                         |
| $t_y$ Time at study closure for individual participant. This should be equal to $t_4$ if all assessments are completed on schedule. |                                                                                                                                                                                                                                                           |
| ** Baseline Questionnaire                                                                                                           | Questionnaire for all patients who have been allocated in the study. Same for all groups. Captures basic demographic data as well as questions about previous knee treatment and surgery.                                                                 |
| ^ Willingness for Surgery                                                                                                           | This assessment asks the question "Are your knee symptoms so bothersome that you wish to undergo surgery if medically fit to do so?" Yes / No. If yes, "In what time frame are you willing to have surgery?" [Time in months].                            |
| ^^ Already Proceeded with Surgery                                                                                                   | This assessment asks the question "Have you already received a TKA for your knee symptoms?" Yes / No. The purpose for this assessment is to 1) check if the patient has undergone TKA, and 2) outcome aligns with their willingness for surgery response. |
| ^^^ PROMs                                                                                                                           | This assessment consists of the VR12 and EQ5D3L questionnaires.                                                                                                                                                                                           |
| # Qualitative Questionnaires                                                                                                        | This assessment consists of K-DQI (decision quality) and SURE (decisional conflict) tools.                                                                                                                                                                |

630

631 **9. CLINICAL ASSESMENTS**

632

633

634 *9.1. Eligibility Screening*

635

636 Eligibility screening will be performed prior to allocation using the eligibility criteria  
637 described in Section 7.2.3. The screening questionnaire will be electronic and automated.

638 Further eligibility information will be ascertained during discussion prior to informed consent  
639 (see Section 9.2).

640

641 *9.2. Patient Information Sheet and Consent Form*

642

643 Appendix 1 – PICF.

644

645 *9.3. Baseline Questionnaire*

646

647 The baseline questionnaire provides investigators an understanding of the participant's  
648 general characteristics. This questionnaire will only be asked at the first assessment visit  
649 during the study (see section 8). The questionnaire would include asking about contact  
650 details, date of birth, gender, height, weight, co-morbidities, medications (analgesia),  
651 smoking status, previous non-operative management of affect knee OA symptoms,  
652 consultation with Orthopaedic Surgeon in the past, appointment to see Orthopaedic Surgeon  
653 arranged, previous surgery, previous injury to affected knee, and presence of contralateral  
654 TKA.

655

656 The questionnaire will be structured to capture the following information:

657

658

659

660

661

662

663

664

665

666

667

668

669

670

671

672

673

674

675

676

677

678

679

680

- Current height / weight
- Current medical conditions
- Smoking status – current, ex-smoker, never
- Question: Have you ever seen an Orthopaedic Surgeon for your affected knee?
  - Yes / No
    - If yes, how long ago did you see your surgeon? (time in weeks)
    - If yes, have you been booked for a knee replacement surgery? (Yes / No)
  - If no, have you been referred to see an Orthopaedic Surgeon for your affected knee?
    - Yes / No
      - If yes, approximately when will you expect to see the Orthopaedic Surgeon? (time in weeks, or “don’t know”)
- Question: Have you received non-surgical treatment for your affected knee? (Check box)
  - Lifestyle change advice e.g. weight loss, exercise, nutrition
  - Simple analgesia (excluding opioids) e.g. paracetamol, non-steroidal anti-inflammatories (NSAIDs)
  - Opioid analgesia e.g. codeine, tramadol, morphine, oxycodone
  - Physiotherapy
  - Intra-articular injection (steroid)
  - Intra-articular injection (non-steroid) e.g. autologous proteins solution, Synvisc
  - Other

- 681 ○ None of the above (grey out this option if any of the above are selected)
- 682 ● Question: Have you ever had surgery before on your affected knee?
- 683 ○ Yes / No
- 684     ▪ If yes, provide details (free text)

685  
686  
687

#### 9.4. Regular Assessments

688 Regular assessments will be conducted in accordance to the SoA. This will consist of  
689 “willingness for surgery”, “already proceeded with surgery”, and PROM assessments.  
690 Patients will be followed up through automated communication via REDCap software. The  
691 timeline on the SoA details the timing for the assessments (see section 8).

692  
693

##### 9.4.1. Willingness for Surgery

694

695 This assessment is in the form of a single binary question: “Are your knee symptoms so  
696 bothersome that you would be willing to undergo surgery if medically fit to do so? (Yes/No)”  
697 If yes, “In what time frame are you willing to have surgery?” [Time in months]. The purpose  
698 for this assessment is to evaluate if the patient is still of the mindset to proceed with surgery.  
699 This is used as a proxy measurement in place of actual procession with surgery, as the latter  
700 would require substantially longer follow up beyond the scope of this study.

701

702

##### 9.4.2. Already Proceeded with Surgery

703

704 This assessment asks the single binary question: “Have you already received a TKA for your  
705 knee symptoms? (Yes/No).” The purpose of this assessment is to 1) correlate true outcomes  
706 for willingness for surgery if applicable, and 2) differentiate PROM data between knee OA  
707 symptoms (if not proceeded with surgery yet) or TKA outcomes. This will not be asked at the  
708 initial assessment.

709

710

##### 9.4.3. PROMs

711

712 For this study, we will use patient EQ-5D-3L (Appendix 6) and VR-12 (Appendix 3) as the  
713 PROM tools. The justification for using these specific tools is due to the SMART Registry  
714 already capturing this data from patients. Given the development of the SMART CHOICE  
715 tool will come from SMART Registry data, we will be able to better align our outcomes from  
716 this study to the prognostic tool predictions. Participants will be asked to complete all  
717 PROMs at each regular assessment schedule.

718

719

#### 9.5. Wellbeing Check

720

721 All participants will be offered the opportunity to provide feedback or raise concerns about  
722 their wellbeing at any point for the duration of the study. This opportunity will also be  
723 reminded to participants at each regular assessment timepoint.

724

725 **10. STUDY WORKFLOW**

726

727 This workflow describes the stepwise process for how the study will be conducted.

728

729

730 *10.1. Initial Screening*

731

732 *10.1.1 HCF Source*

733

734 As described in 7.1, HCF will advertise this study on two platforms; their internal magazine  
735 and their HealthShare platform. The internal magazine will use an article about knee  
736 replacements to advertise the study. Patients will follow instructions on these platforms to  
737 contact us to express interest in the study. No explicit screening will occur from this source,  
738 except the screening questions as part of the website (section 7.2.3). The HealthShare  
739 platform will ask potential participants a single initial screening question: “Do you suffer  
740 from knee arthritis and are considering a knee replacement?”

741

742 *10.1.2 SVHM Source*

743

744 Access to prospective and retrospective Orthopaedic Outpatient clinic appointments will be  
745 screened for patients who:

- 746 • Have been booked a new appointment for consideration of unilateral primary knee  
747 replacement, and/or
- 748 • Have been referred by their General Practitioner (GP) for unilateral knee pain, likely  
749 OA
- 750 • Have recently (within 12 months) had a consultation with an Orthopaedic Surgeon to  
751 consider unilateral primary knee replacement AND not yet undergone surgery
- 752 • Awaiting re-review with an Orthopaedic Surgeon for knee surgery
- 753 • On the surgical waiting list awaiting total knee replacement

754

755 This information will be gathered from two sources:

- 756 • Clinic lists available on the SVHM patient administrative system
- 757 • Query with SVHM administrative staff who are responsible for booking clinic  
758 appointments

759

760 From this pool of patients who have been identified as potentially suitable for the study, a  
761 research assistant will check their electronic patient records (EPR; at SVHM the systems used  
762 are PAS and MRO) for major exclusion criteria such as:

- 763 • History of rheumatoid arthritis
- 764 • Significant bilateral knee symptoms (through old clinic letters or referral notes)
- 765 • Previous contralateral TKA
- 766 • Under 45 years old

767

768 All patients who pass the initial screening process will be contacted for eligibility screening  
769 and formal recruitment (up until 200 patients have been formally recruited into the study or  
770 the recruitment phase ends, whichever comes first).

771

772 *10.2. Eligibility Screening and Formal Recruitment*

773

774 For participants in the SVHM cohort who pass the initial screening, a brief phone call will be  
775 made to inform them of the study before a subsequent email is sent with a link to the study  
776 website. For participants in the HCF cohort who pass the initial screening, the link to the  
777 study website will be available on the advertising platform(s).

778  
779 If the participant clicks on the link, they will be directed to a secure online form where they  
780 can conduct the study. They will be provided with a copy of the PICF and asked to acknowledge  
781 before proceeding. Potential participants will be asked to answer the eligibility screening  
782 questions, as described in section 7.2.3:

- 783 • Have you been diagnosed with knee OA?
  - 784 ○ If no, patient will be excluded.
- 785 • Which knee is most affected by your symptoms?
  - 786 ○ Left or right.
- 787 • Have you already had a knee replacement on your affected knee?
  - 788 ○ If yes, patient will be excluded.
- 789 • Have you trialed non-operative treatment for your affected knee, such as pain relief  
790 medication, lifestyle changes, or physiotherapy **within the last 12 months**?
  - 791 ○ If no, patient will be excluded.

792 If any of the responses result in the participant being ineligible for the study, the participant  
793 will be notified they have been excluded and thanked for their time. Participants will be  
794 encouraged to contact the research team if they have any questions about their eligibility.

795  
796 If the participant passes the eligibility screen, they will continue the study through the  
797 website.

798  
799 At any point during this process, the participant will have the ability to stop and not proceed  
800 with the recruitment process by exiting the browser. Participants who have registered with the  
801 study but not completed the first stage will be recorded. Researchers can then contact the  
802 participants to remind them to complete the study, or ask if they would like to be excluded  
803 from the study.

### 804 805 *10.3. Initial Assessment*

806  
807 All participants who have been formally recruited to the study will then continue with the  
808 online forms to undergo the initial assessment. This will comprise of:

- 809 • Baseline questionnaire (section 9.3)
  - 810 • Current height / weight
  - 811 • Current medical conditions
  - 812 • Current medications (including over the counter medications such as pain relief)
  - 813 • Smoking status – current, ex-smoker, never
  - 814 • Question: Have you ever seen an Orthopaedic Surgeon for your affected knee?
    - 815 ○ Yes / No
      - 816 ▪ If yes, how long ago did you see your surgeon? (time in weeks)
      - 817 ▪ If yes, have you been booked for a knee replacement surgery? (Yes  
818 / No)
    - 819 ○ If no, have you been referred to see an Orthopaedic Surgeon for your  
820 affected knee?
      - 821 ▪ Yes / No
        - 822 • If yes, approximately when will you expect to see the  
823 Orthopaedic Surgeon? (time in weeks, or “don’t know”)

- 824           • Question: Have you received non-surgical treatment for your affected knee?  
825            (Check box)
- 826            ○ Lifestyle change advice e.g. weight loss, exercise, nutrition
  - 827            ○ Simple analgesia (excluding opioids) e.g. paracetamol, non-steroidal anti-  
828            inflammatories (NSAIDs)
  - 829            ○ Opioid analgesia e.g. codeine, tramadol, morphine, oxycodone
  - 830            ○ Physiotherapy
  - 831            ○ Intra-articular injection (steroid)
  - 832            ○ Intra-articular injection (non-steroid) e.g. autologous proteins solution,  
833            Synvisc
  - 834            ○ Other
  - 835            ○ None of the above (grey out this option if any of the above are selected)
- 836           • Question: Have you ever had surgery before on your affected knee?  
837            ○ Yes / No
- 838            ▪ If yes, provide details (free text)
- 839           • Willingness for surgery (section 9.4.1)
- 840            ○ “Are your knee symptoms so bothersome that you would be willing to  
841            undergo surgery if medically fit to do so? (Yes/No)” If yes, “In what time  
842            frame are you willing to have surgery?” [Time in months].
- 843           • PROM scores (section 9.4.3)
- 844            ○ VR-12
  - 845            ○ EQ-5D-3L
- 846

847 After the initial assessment is complete, the participant will be allocated automatically  
848 through the browser (and randomly via computer random number generator). The participant  
849 will be blinded to their allocation arm.

#### 851            10.4. Allocation

852

853 Allocations will be recorded on REDCap, but limited disclosure will be used in this study to  
854 conceal the intervention allocated to the participant. Participants in the intervention group  
855 will be presented the results of the *SMART Choice* tool. A notice will thank the participant for  
856 their contribution to the study, and will remind them that their next assessment will arrive via  
857 email in 6 week’s time.

858

859 If a participant is allocated to the TAU group, they will receive a notice that thanks them for  
860 their participation in the study so far, and similarly will be reminded that their next  
861 assessment will arrive via email in 6 week’s time. Although participants in the TAU group  
862 will not have the results of *SMART Choice* presented to them, their probability scores will be  
863 recorded discretely for comparison to the intervention group.

#### 865            10.5. Regular Assessments

866

867 Regular assessments will occur via email link to the participant as per the SoA. This will  
868 automated using the REDCap software. There will be a single version of REDCap housed on  
869 University of Melbourne servers for HCF and SVHM patients. REDCap will send email  
870 follow up to assess willingness for surgery, already proceeded with surgery, and PROMs at 6  
871 weeks, 12 weeks, and 6 months after initial assessment. The format for assessing these  
872 metrics will be similar to the initial assessment. All regular assessments will provide an  
873 opportunity for participants to feedback on the study and their wellbeing.

874

875 *10.6. Data Collection*

876

877 All data will be collected online as the participant enters their information. Data will be  
878 stored on secure servers at either HCF or SVHM. See detail data management plan in section  
879 13 for further details.

880

881 *10.7. Trial Closure*

882

883 After the 6-month regular assessment, the participant will be notified that the study has  
884 concluded for them. Participants in the TAU group will be provided a standalone link to use  
885 the *SMART Choice* tool if they wish. Contact details will once again be provided to  
886 participants should they have any queries or concerns after conclusion of the study.

887  
888  
889  
890  
891  
892  
893  
894  
895  
896  
897  
898  
899  
900  
901  
902  
903  
904  
905  
906  
907  
908  
909  
910  
911  
912  
913  
914  
915  
916  
917  
918  
919  
920  
921  
922  
923  
924

## 11. NESTED QUALITATIVE STUDY

### 11.1. Synopsis

A nested qualitative study will be incorporated into the main clinical trial. The purpose of this study is to evaluate the user experience of *SMART Choice* for patients. Specifically, experiences regarding patient decision conflict and knowledge will be assessed. Qualitative analysis will be obtained from two methods: 1) qualitative questionnaires, and 2) semi-structured interviews.

The former method will utilise an exploratory standpoint to investigate constructs that play a role in our main trial outcomes. On the contrary, the latter method will be used to confirm our *a priori* assumptions and hypotheses about what constructs might play a role in our main trial outcomes. Both methods are needed to provide a holistic understanding of the user experience for *SMART Choice*.

### 11.2. Qualitative Questionnaires

All participants in the main clinical trial will be sent two additional questionnaires via email at the time of their final assessment. These questionnaires are validated from previous research to produce discriminatory and reproducible results.<sup>3,27</sup> The addition of these questionnaires will provide a cross-sectional understanding of how useful the *SMART Choice* tool was for patient decision-making.

The first questionnaire is the “Knee Osteoarthritis Decision Quality Instrument” (K-DQI). This questionnaire is specific for patients who suffer from knee osteoarthritis. The questionnaire aims to assess:

- Which aspects of decision-making matter most to the patient
- How well the patient is understanding the information provided, and
- The level of communication between patient and clinician prior to decision-making.

Appendix 4 – K-DQI.

The second questionnaire is a short screening tool to assess decisional conflict. It consists of four binary items using the acronym “SURE”.

| SURE Acronym           | Items                                                            | Yes [1]                  | No [0]                   |
|------------------------|------------------------------------------------------------------|--------------------------|--------------------------|
| Sure of myself         | Do you feel SURE about the best choice for you?                  | <input type="checkbox"/> | <input type="checkbox"/> |
| Understand information | Do you know the benefits and risks of each option?               | <input type="checkbox"/> | <input type="checkbox"/> |
| Risk-benefit ratio     | Are you clear about which benefits and risks matter most to you? | <input type="checkbox"/> | <input type="checkbox"/> |
| Encouragement          | Do you have enough support and advice to make a choice?          | <input type="checkbox"/> | <input type="checkbox"/> |

If a patient answers “no” to 1 or more questions, then the screen is considered positive for decisional conflict. Understanding decisional conflict is important to ensure the information provided by *SMART Choice* is presented with clarity and aids the overall experience for patients on their TKA journey.

Appendix 5 – SURE.



933  
934  
935  
936  
937  
938  
939  
940  
941  
942  
943  
944  
945  
946  
947  
948  
949  
950  
951  
952  
953  
954  
955  
956  
957  
958  
959  
960  
961  
962  
963  
964  
965  
966  
967  
968  
969  
970  
971  
972  
973  
974  
975  
976  
977  
978  
979  
980  
981  
982

### 11.3. *Semi-Structured Interviews*

Participants from the intervention group will be asked to take part in semi-structured interviews. Purposive sampling will be used to ensure equal representation of participants (e.g. gender and age range) from each study cohort (HCF and SVHM) will be recruited. The recruitment process will be ongoing until saturation of common themes is met. As such, there is no sample size calculation possible and this is standard practice for qualitative study methodology.

Participants must provide additional consent to take part in the semi-structured interviews. This will be included as an optional section to the PICF for the main clinical trial.

The aims of the interviews are to:

- Explore the barriers and enablers of *SMART Choice* adoption into clinical practice
- Understand the processes underlying the main trial outcomes

With these aims, the interviews ask the following overarching research questions:

- What are the participant's perceptions of the *SMART Choice* tool?
- In what ways did the *SMART Choice* tool impact on the decision-making process?
- Why are patients willing or unwilling to undergo TKA after using the *SMART Choice* tool?

Example questions that will be asked in the interviews are:

- Can you describe the *SMART Choice* tool to me?
- How easy or hard did you find the tool to use?
- How do you think we could make it easier for people to use in the future?
- Can you explain to me how you think TKA could help you? Why do you think this?
- The *SMART Choice* tool indicated your likely outcome from TKA is X – what do you think about this?
- You have indicated you are (un)willing to undergo TKA surgery – why is this?

The interviews will be conducted by an experienced and trained qualitative researcher. Each interview will take approximately 1 hour to complete. The setting of the interview can be face-to-face (subject to COVID-19 restrictions) or over telephone / video call. The interview contents will be audio recorded and transcribed. Thematic analysis will be used to group common themes obtained from the interviews.

#### 11.3.1. *Data Storage of Semi-Structured Interviews*

All interviews will be audio recorded with the audio file securely stored and separated from transcripts. Verbal consent will be recorded as part of the interview. Transcription will be performed by a transcription company that is associated with and complies with The University of Melbourne's research integrity and privacy policies. All transcripts will be de-identified. Audio recordings will be destroyed at the conclusion of the study. Transcripts will be stored for a further 7 years, then destroyed. The data management plan outline for the semi-structured interviews are in addition to the data management plan for the project (section 13).

983 **12. ECONOMIC ANALYSIS OF SMART CHOICE**

984

985

986 *12.1. Synopsis*

987

988 An economic analysis of the *SMART Choice* tool will be conducted in line with standard  
989 economic principles. De-identified participant data will be assigned with cost utilities that  
990 have been standardised. The outcome will be to calculate the cost-benefit and economic  
991 impact of using the *SMART Choice* tool in the context of willingness for surgery, and  
992 reduction in non-beneficial TKAs.

993

994

995

996 **13. DATA MANAGEMENT PLAN**

997

998

999

13.1. *Data Collection*

1000

1001 All data collection will follow guidelines as mandated by Australian Privacy laws. Data will  
1002 be collected from the online forms used for regular assessments and *SMART Choice* tool  
1003 website.

1004

1005

13.2. *Data Storage*

1006

1007 Initial attempts were made to separate HCF and SVHM data collection via REDCap with  
1008 UniMelb and SVHM servers, respectively. The reason for this was to retain SVHM patient  
1009 information on SVHM servers. However, the SVHM REDCap system does not have the  
1010 capacity to send email follow up surveys whereas the UniMelb REDCap system does. This is  
1011 a critical function of REDCap that is required for the study to progress to completion. As a  
1012 result, all participants in the study will have their study information uploaded to UniMelb  
1013 REDCap to ensure that follow up questionnaires are emailed at our specified follow up  
1014 timepoints. All data that is housed on UniMelb REDCap servers can only be accessed by  
1015 study team members that are affiliated with UniMelb, have a UniMelb login and password,  
1016 and are able to pass 2-factor authentication. Specific to SVHM, the only identifiable  
1017 information that will be housed on UniMelb REDCap servers is the first name, last name,  
1018 email address, and mobile phone number.

1019

1020 For participants who use the SMART Choice website, data will be captured and stored on a  
1021 secure server at The University of Melbourne. This will only be accessible by University staff  
1022 who are directly involved in this project (named on this protocol) and have a unique  
1023 username and password. For participants from the SVHM source, this information will be de-  
1024 identified and given a study ID instead. For participants from other sources, identifiable  
1025 information will be captured and stored.

1026

1027

13.3. *General Principals*

1028

1029 All participants in the intervention arm of the study will have access to the *SMART Choice*  
1030 tool website via their own unique login credentials. These credentials will entitle the  
1031 participant to access a limited version of the website. User account permissions will be  
1032 limited so participants can only see their *SMART Choice* responses. Administrator account  
1033 permissions will be available only to investigators and research assistants who can create new  
1034 user accounts, see/search for participants, and export datasets.

1035

1036 Furthermore, the *SMART Choice* tool website will not be accessible by public search engines.  
1037 This limits accessibility of the tool to only participants with a link and login credentials. Once  
1038 the study concludes, a version of the website that hosts the *SMART Choice* tool as a  
1039 standalone format will be open access.

1040

1041 All soft copy patient identifiable documents will be located on a password protected  
1042 computers in restricted access spaces. For participants in the SVHM cohort, information will  
1043 be stored within SVHM computer networks physically located at SVHM. For remote access,  
1044 two-factor authentication is required. For participants in the HCF cohort, information will be  
1045 stored within The University of Melbourne computer networks. Similarly, remote access to

1046 this network also requires two-factor authentication. Study dataset codebooks will be  
1047 password protected.

1048

1049 All hard copy patient identifiable documents will be in a restricted office area on SVHM  
1050 location. All consent forms will be stored separately to other project information.

1051

1052 *13.4. Study Record Retention*

1053

1054 All data collected will be stored for a minimum of 7 years after the conclusion of the study.

1055

1056 **14. ADMINISTRATIVE ASPECTS**

1057

1058

1059 *14.1. Confidentiality*

1060

1061 Subject confidentiality is strictly held in trust by the participating investigators, research staff,  
1062 and the study institution(s). The study protocol, documentation, data and all other information  
1063 generated will be held in strict confidence. No information concerning the study or the data  
1064 will be released to any unauthorized third party, without prior written approval of the  
1065 sponsoring institutions (HCF, SVHM, and The University of Melbourne). Authorized  
1066 representatives of the sponsoring institution may inspect all documents and records required  
1067 to be maintained by the PI, limited to their recruited participants, including but not limited to,  
1068 medical records (office, clinic or hospital) and pharmacy records for the subjects in this  
1069 study. The clinical study site will permit access to such records. Clinical information will not  
1070 be released without written permission of the subject, except as necessary for monitoring by  
1071 Ethics Committee or regulatory agencies.

1072

1073 *14.2. Independent Ethics Committee Approval*

1074

1075 This protocol and the informed consent document and any subsequent modifications will be  
1076 reviewed and approved by the Ethics Committees of The University of Melbourne and  
1077 SVHA. A letter of ethics approval by both Committees will be obtained prior to the  
1078 commencement of the study, as well as approval for other study documents subject to the  
1079 Committees reviews.

1080

1081 *14.3. Modifications of the Protocol*

1082

1083 This study will be conducted in compliance with the current version of the protocol. Any  
1084 change to the protocol document, PIS, or CF that affects the scientific intent, study design,  
1085 patient safety, or may affect a participants willingness to continue participation in the study is  
1086 considered an amendment, and therefore will be written and filed as an amendment to this  
1087 protocol and/or CF. All such amendments will be submitted to the local Ethics Committees,  
1088 for approval prior to becoming effective.

1089

1090 *14.4. Protocol Deviations*

1091

1092 All protocol deviations must be recorded in the patient record (source document) and on a  
1093 CRF and must be reported to the PI. Protocol deviations will be assessed for significance by  
1094 the PI. Those deviations deemed to have a potential impact on the integrity of the study  
1095 results, patient safety or the ethical acceptability of the trial will be reported to the local  
1096 Ethics Committee within 14 days.

1097

1098 Where deviations to the protocol identify issues for protocol review, the protocol will be  
1099 amended as per section 13.3

1100

1101 *14.5. Participant Reimbursement*

1102

1103 Participants will not be reimbursed for the main clinical trial. However, for participants in the  
1104 semi-structured interviews a \$25AUD supermarket voucher will be offered for their time.

1105

1106 *13.6. Financial Disclosure and Conflicts of Interest*

1107

1108 All investigators and research staff must declare any conflicts of interest or financial interest  
1109 relating to the study prior to involvement with the study. This will be disclosed in accordance  
1110 with The University of Melbourne and SVHA Research Integrity Policies.

1111

1112

1113

1114

1115

1116 **REFERENCES**  
1117

- 1118 1. Baker PN, van der Meulen JH, Lewsey J, Gregg PJ, National Joint Registry for England  
1119 and Wales. The role of pain and function in determining patient satisfaction after total  
1120 knee replacement. Data from the National Joint Registry for England and Wales. *J. Bone*  
1121 *Joint Surg. Br.* 2007 Jul;89(7):893–900.
- 1122 2. Bendich I, Halvorson RT, Ward D, Nevitt M. Predictors of a change in patient  
1123 willingness to have Total knee arthroplasty: Insights from the osteoarthritis initiative.  
1124 *Knee.* 2020 Jun;27(3):667–675.
- 1125 3. Boland L, Légaré F, McIsaac DI, Graham ID, Taljaard M, Dècary S, et al. SURE Test  
1126 Accuracy for Decisional Conflict Screening among Parents Making Decisions for Their  
1127 Child. *Med. Decis. Making.* 2019 Nov;39(8):1010–1018.
- 1128 4. Carr AJ, Robertsson O, Graves S, Price AJ, Arden NK, Judge A, et al. Knee  
1129 replacement. *Lancet.* 2012 Apr 7;379(9823):1331–1340.
- 1130 5. Chan A-W, Tetzlaff JM, Gøtzsche PC, Altman DG, Mann H, Berlin JA, et al. SPIRIT  
1131 2013 explanation and elaboration: guidance for protocols of clinical trials. *BMJ*  
1132 [Internet]. 2013 Jan 9 [cited 2021 Oct 11];346. Available from:  
1133 <https://www.bmj.com/content/346/bmj.e7586doi:10.1136/bmj.e7586>
- 1134 6. Chow S-C, Shao J, Wang H, Lokhnygina Y. Sample size calculations in clinical  
1135 research: Third edition. 3rd ed. Third edition. | Boca Raton : Taylor & Francis, 2017. |  
1136 Series: Chapman & Hall/CRC biostatistics series | “A CRC title, part of the Taylor &  
1137 Francis imprint, a member of the Taylor & Francis Group, the academic division of T&F  
1138 Informa plc.”: Chapman and Hall/CRC; 2017.
- 1139 7. De Castro P, Heidari S, Babor TF. Sex And Gender Equity in Research (SAGER):  
1140 reporting guidelines as a framework of innovation for an equitable approach to gender  
1141 medicine. *Commentary. Ann. Ist. Super. Sanita.* 2016 Apr;52(2):154–157.
- 1142 8. Dell’Isola A, Jönsson T, Rolfson O, Cronström A, Englund M, Dahlberg L. Willingness  
1143 to Undergo Joint Surgery Following a First-Line Intervention for Osteoarthritis: Data  
1144 From the Better Management of People With Osteoarthritis Register. *Arthritis Care Res.*  
1145 . 2021 Jun;73(6):818–827.
- 1146 9. Dhurve K, Scholes C, El-Tawil S, Shaikh A, Weng LK, Levin K, et al. Multifactorial  
1147 analysis of dissatisfaction after primary total knee replacement. *Knee.* 2017  
1148 Aug;24(4):856–862.
- 1149 10. Felson DT, Zhang Y, Hannan MT, Naimark A, Weissman BN, Aliabadi P, et al. The  
1150 incidence and natural history of knee osteoarthritis in the elderly. The Framingham  
1151 Osteoarthritis Study. *Arthritis Rheum.* 1995 Oct;38(10):1500–1505.
- 1152 11. Gandhi R, Tsvetkov D, Davey JR, Mahomed NN. Survival and clinical function of  
1153 cemented and uncemented prostheses in total knee replacement: a meta-analysis. *J. Bone*  
1154 *Joint Surg. Br.* 2009 Jul;91(7):889–895.

- 1155 12. Gill GS, Joshi AB, Mills DM. Paper #5 20 year survivorship analysis of total condylar  
1156 knee arthroplasty. *J. Arthroplasty*. 1999 Feb;14(2):245.
- 1157 13. Gøthesen O, Espehaug B, Havelin L, Petursson G, Lygre S, Ellison P, et al. Survival  
1158 rates and causes of revision in cemented primary total knee replacement: a report from  
1159 the Norwegian Arthroplasty Register 1994-2009. *Bone Joint J*. 2013 May;95-B(5):636–  
1160 642.
- 1161 14. Gould D, Thuraisingam S, Shadbolt C, Knight J, Young J, Schilling C, et al. Cohort  
1162 profile: the St Vincent’s Melbourne Arthroplasty Outcomes (SMART) Registry, a  
1163 pragmatic prospective database defining outcomes in total hip and knee replacement  
1164 patients. *BMJ Open*. 2021 Jan 22;11(1):e040408.
- 1165 15. Gray PC, Choe S. Design-augmented (DA) biologics: BMP chimeras for bone and  
1166 cartilage regeneration. *Osteoarthritis Cartilage*. 2020 Feb;28(2):123–125.
- 1167 16. Gutacker N, Street A. Use of large-scale HRQoL datasets to generate individualised  
1168 predictions and inform patients about the likely benefit of surgery. *Qual. Life Res*. 2017  
1169 Sep;26(9):2497–2505.
- 1170 17. Hadley CJ, Shi WJ, Murphy H, Tjoumakaris FP, Salvo JP, Freedman KB. The Clinical  
1171 Evidence Behind Biologic Therapies Promoted at Annual Orthopaedic Meetings: A  
1172 Systematic Review. *Arthroscopy*. 2019 Jan;35(1):251–259.
- 1173 18. Hawker GA, Conner-Spady BL, Bohm E, Dunbar MJ, Jones CA, Ravi B, et al. The  
1174 relationship between patient-reported readiness for total knee arthroplasty and likelihood  
1175 of a good outcome at one year. *Arthritis Care Res*. [Internet]. 2021 Jan 18;(acr.24562).  
1176 Available from:  
1177 <https://onlinelibrary.wiley.com/doi/10.1002/acr.24562doi:10.1002/acr.24562>
- 1178 19. Knapik DM, Evuarherhe A, Frank RM, Steinwachs M, Rodeo S, Mumme M, et al.  
1179 Nonoperative and Operative Soft-Tissue and Cartilage Regeneration and Orthopaedic  
1180 Biologics of the Knee: An Orthoregeneration Network (ON) Foundation Review.  
1181 *Arthroscopy*. 2021 Aug 1;37(8):2704–2721.
- 1182 20. Liddle AD, Judge A, Pandit H, Murray DW. Adverse outcomes after total and  
1183 unicompartmental knee replacement in 101 330 matched patients: a study of data from  
1184 the National Joint Registry for England and Wales. *Lancet*. 2014 Oct  
1185 18;384(9952):1437–1445.
- 1186 21. Mayfield CK, Haglin JM, Levine B, Della Valle C, Lieberman JR, Heckmann N.  
1187 Medicare Reimbursement for Hip and Knee Arthroplasty From 2000 to 2019: An  
1188 Unsustainable Trend. *J. Arthroplasty*. 2020 May;35(5):1174–1178.
- 1189 22. Moher D, Hopewell S, Schulz KF, Montori V, Gøtzsche PC, Devereaux PJ, et al.  
1190 CONSORT 2010 Explanation and Elaboration: updated guidelines for reporting parallel  
1191 group randomised trials. *BMJ* [Internet]. 2010 Mar 24 [cited 2021 Oct 11];340.  
1192 Available from: <https://www.bmj.com/content/340/bmj.c869doi:10.1136/bmj.c869>
- 1193 23. Ong KL, Runa M, Lau E, Altman R. Is Intra-Articular Injection of Synvisc Associated  
1194 with a Delay to Knee Arthroplasty in Patients with Knee Osteoarthritis? *Cartilage*. 2019  
1195 Oct;10(4):423–431.



- 1196 24. Richmond J, Hunter D, Irrgang J, Jones AMH, Snyder-Mackler L, Daniel Van Durme  
1197 MD, et al. The treatment of osteoarthritis (OA) of the knee. *J. Bone Joint Surg. Am.*  
1198 2010;92:990–993.
- 1199 25. Rodriguez JA, Bhende H, Ranawat CS. Total condylar knee replacement: a 20-year  
1200 followup study. *Clin. Orthop. Relat. Res.* 2001 Jul;(388):10–17.
- 1201 26. Rosner B. *Fundamentals of Biostatistics (The 7th edition)*. Boston, MA: Brooks/Cole.  
1202 2011;
- 1203 27. Sepucha KR, Stacey D, Clay CF, Chang Y, Cosenza C, Dervin G, et al. Decision quality  
1204 instrument for treatment of hip and knee osteoarthritis: a psychometric evaluation. *BMC*  
1205 *Musculoskelet. Disord.* 2011 Jul 5;12:149.
- 1206 28. Simon TM, Jackson DW. *Articular Cartilage: Injury Pathways and Treatment Options.*  
1207 *Sports Med. Arthrosc.* 2018 Mar;26(1):31–39.
- 1208 29. Tang A, Almetwali O, Zak SG, Bernstein JA, Schwarzkopf R, Aggarwal VK. Do  
1209 preoperative intra-articular corticosteroid and hyaluronic acid injections affect time to  
1210 total joint arthroplasty? *J Clin Orthop Trauma.* 2021 May;16:49–57.
- 1211 30. Thompson AG, Suñol R. Expectations as determinants of patient satisfaction: concepts,  
1212 theory and evidence. *Int. J. Qual. Health Care.* 1995 Jun;7(2):127–141.
- 1213 31. Vaishya R, Pariyo GB, Agarwal AK, Vijay V. Non-operative management of  
1214 osteoarthritis of the knee joint. *Journal of Clinical Orthopaedics and Trauma.* 2016 Jul  
1215 1;7(3):170–176.
- 1216 32. Verhaar J. Patient satisfaction after total knee replacement—still a challenge. *Acta*  
1217 *Orthop.* 2020 May 3;91(3):241–242.
