# Supplementary material for: Predictive Tool Use and Willingness for Surgery in Patients With Knee Osteoarthritis: A Randomized Clinical Trial
Source: PubMed Central journal article supplement (PMC10924247; doi:10.1001/jamanetworkopen.2024.0890), 2024-03-08
Supplement: jamanetwopen-e240890-s002.pdf [file jamanetwopen-e240890-s002.pdf]

## Supplemental Online Content

Zhou Y, Patten L, Spelman T, et al. Predictive tool use and surgery willingness in patients with knee osteoarthritis. *JAMA Netw Open*. 2024;7(3):e240890. doi:10.1001/jamanetworkopen.2024.0890

**eTable 1.** Change in Willingness for Surgery Compared With Baseline, Stratified by Allocation Group and Decile

**eMethods 1.**

**eMethods 2.**

**eMethods 3.**

**eFigure 1.** Histogram of Probability Scores for the Treatment-as-Usual (TAU) Group

**eFigure 2.** Histogram of Probability Scores for the Tool Group

**eFigure 3.** Histogram of Probability Scores for the Overall (Whole) Cohort

**eTable 2.** Differences in Baseline Symptoms and Function by Recruitment Site

This supplemental material has been provided by the authors to give readers additional information about their work.

**eTable 1.** Change in Willingness for Surgery Compared With Baseline, Stratified by Allocation Group and Decile

| Decile Group                                       | TAU<br>1-3 (Low Probability for<br>Improvement) | Predictive Tool | TAU<br>4-6 (Medium Probability for<br>Improvement) | Predictive Tool | TAU<br>7-10 (High Probability for<br>Improvement) | Predictive Tool |
|----------------------------------------------------|-------------------------------------------------|-----------------|----------------------------------------------------|-----------------|---------------------------------------------------|-----------------|
| Count                                              | 74                                              | 79              | 19                                                 | 18              | 13                                                | 8               |
| Willingness Immediate Post-<br>tool/enrolment* (%) |                                                 |                 |                                                    |                 |                                                   |                 |
| Less Willing                                       | NA                                              | 9 (11.4)        | NA                                                 | 1 (5.6)         | NA                                                | 0 (0.0)         |
| More Willing                                       | NA                                              | 6 (7.6)         | NA                                                 | 3 (16.7)        | NA                                                | 0 (0.0)         |
| Unchanged                                          | NA                                              | 59 (74.7)       | NA                                                 | 14 (77.8)       | NA                                                | 8 (100.0)       |
| Missing                                            | NA                                              | 5 (6.3)         | NA                                                 | 0 (0.0)         | NA                                                | 0 (0.0)         |
| Willingness 6 Weeks Post-<br>tool/enrolment (%)    |                                                 |                 |                                                    |                 |                                                   |                 |
| Less Willing                                       | 7 (9.5)                                         | 10 (12.7)       | 2 (10.5)                                           | 0 (0.0)         | 1 (7.7)                                           | 0 (0.0)         |
| More Willing                                       | 6 (8.1)                                         | 2 (2.5)         | 0 (0.0)                                            | 1 (5.6)         | 0 (0.0)                                           | 0 (0.0)         |
| Unchanged                                          | 50 (67.6)                                       | 51 (64.6)       | 13 (68.4)                                          | 14 (77.8)       | 11 (84.6)                                         | 8 (100.0)       |
| Missing                                            | 11 (14.9)                                       | 16 (20.3)       | 4 (21.1)                                           | 3 (16.7)        | 1 (7.7)                                           | 0 (0.0)         |
| Willingness 12 Weeks Post-<br>tool/enrolment (%)   |                                                 |                 |                                                    |                 |                                                   |                 |
| Less Willing                                       | 7 (9.5)                                         | 14 (17.7)       | 2 (10.5)                                           | 1 (5.6)         | 1 (7.7)                                           | 1 (12.5)        |
| More Willing                                       | 4 (5.4)                                         | 5 (6.3)         | 0 (0.0)                                            | 1 (5.6)         | 0 (0.0)                                           | 0 (0.0)         |
| Unchanged                                          | 50 (67.6)                                       | 46 (58.2)       | 14 (73.7)                                          | 13 (72.2)       | 11 (84.6)                                         | 6 (75.0)        |
| NA                                                 | 13 (17.6)                                       | 14 (17.7)       | 3 (15.8)                                           | 3 (16.7)        | 1 (7.7)                                           | 1 (12.5)        |
| Willingness 6 Months Post-<br>tool/enrolment (%)   |                                                 |                 |                                                    |                 |                                                   |                 |
| Less Willing                                       | 12 (16.2)                                       | 13 (16.5)       | 2 (10.5)                                           | 2 (11.1)        | 0 (0.0)                                           | 0 (0.0)         |
| More Willing                                       | 4 (5.4)                                         | 6 (7.6)         | 0 (0.0)                                            | 1 (5.6)         | 0 (0.0)                                           | 0 (0.0)         |
| Unchanged                                          | 50 (67.6)                                       | 48 (60.8)       | 14 (73.7)                                          | 14 (77.8)       | 12 (92.3)                                         | 8 (100.0)       |

Missing 8 (10.8) 12 (15.2) 3 (15.8) 1 (5.6) 1 (7.7) 0 (0.0)

*TAU: treatment as usual; \*participants in TAU group did not use the tool and therefore no immediate post-tool willingness for surgery was recorded.*

*NB: Fisher's exact test was used to compare proportions of willingness for surgery at each timepoint. No statistical differences were found.*

## eMethods 1

This supplementary document provides sensitivity analyses of the primary and secondary outcomes – willingness for surgery and treatment preference. The treatment effects are presented in an identical format to the main results of the study, using odds ratios (OR) with 95% confidence intervals.

### Sensitivity Analysis 1 – HCF Cohort Only

In this analysis, only participants recruited from the HCF (private health insurance) site are included. There was insufficient sample size of participants from the SVHM (St. Vincent’s Hospital Melbourne) site to perform an equivalent sensitivity analysis in this cohort.

Table. Odds ratios for willingness for surgery and treatment preference (unadjusted and adjusted) for HCF cohort only.

**Table.** Treatment effects of predictive tool use on various outcome measures (HCF Only)

| Outcome Measure         | Outcome             | Adjustment                                                  | Timepoint | Odds Ratios | Lower 95%CI | Upper 95%CI | P Value |
|-------------------------|---------------------|-------------------------------------------------------------|-----------|-------------|-------------|-------------|---------|
| Willingness for Surgery | Willing for surgery | Unadjusted                                                  | Immediate | 0.63        | 0.35        | 1.14        | 0.141   |
|                         |                     |                                                             | 6 Weeks   | 0.54        | 0.28        | 1.01        | 0.058   |
|                         |                     |                                                             | 12 Weeks  | 0.47        | 0.25        | 0.89        | 0.021   |
|                         | Willing for surgery | Adjusted for baseline difference in willingness for surgery | 6 Months  | 0.68        | 0.36        | 1.25        | 0.236   |
|                         |                     |                                                             | Immediate | 0.71        | 0.27        | 1.84        | 0.603   |
|                         |                     |                                                             | 6 Weeks   | 0.58        | 0.25        | 1.13        | 0.214   |
|                         |                     |                                                             | 12 Weeks  | 0.55        | 0.25        | 1.17        | 0.128   |

|                      |                                                                   |                                                             |          |      |      |      |       |
|----------------------|-------------------------------------------------------------------|-------------------------------------------------------------|----------|------|------|------|-------|
|                      |                                                                   |                                                             | 6 Months | 0.84 | 0.40 | 1.76 | 0.893 |
|                      | Feels uncertain about treatment preference                        |                                                             | 6 Months | 0.33 | 0.14 | 0.70 | 0.005 |
| Treatment Preference | Prefers surgical treatment (if not uncertain about treatment)     | Unadjusted                                                  | 6 Months | 0.45 | 0.21 | 0.92 | 0.031 |
|                      | Prefers non-surgical treatment (if not uncertain about treatment) |                                                             | 6 Months | 2.23 | 1.08 | 4.67 | 0.031 |
|                      | Feels uncertain about treatment preference                        |                                                             | 6 Months | 0.35 | 0.15 | 0.76 | 0.041 |
| Treatment Preference | Prefers surgical treatment (if not uncertain about treatment)     | Adjusted for baseline difference in willingness for surgery | 6 Months | 0.48 | 0.20 | 1.13 | 0.098 |
|                      | Prefers non-surgical treatment (if not uncertain about treatment) |                                                             | 6 Months | 2.09 | 0.89 | 5.06 | 0.098 |

### Sensitivity Analysis 2 – Imputed Dataset

In this analysis, the “mice” package in R was used to generate an imputed dataset. The multiple imputation process used age, sex, decile, site, allocation group, and willingness at all other timepoints as variables in the model. Chained equations were used to iteratively impute missing values for each variable while considering the observed values of others. We used predictive mean matching as the imputation method.

Table. Odds ratios for willingness for surgery and treatment preference (unadjusted and adjusted) for the imputed dataset.

| Outcome Measure         | Outcome                                                           | Adjustment                                                  | Timepoint | Odds Ratios | Lower 95%CI | Upper 95%CI | P Value |
|-------------------------|-------------------------------------------------------------------|-------------------------------------------------------------|-----------|-------------|-------------|-------------|---------|
| Willingness for Surgery | Willing for surgery                                               | Unadjusted                                                  | Immediate | 0.64        | 0.36        | 1.13        | 0.123   |
|                         |                                                                   |                                                             | 6 Weeks   | 0.57        | 0.32        | 1.01        | 0.053   |
|                         |                                                                   |                                                             | 12 Weeks  | 0.51        | 0.28        | 0.91        | 0.023   |
|                         |                                                                   |                                                             | 6 Months  | 0.70        | 0.40        | 1.24        | 0.220   |
|                         |                                                                   |                                                             | Immediate | 0.69        | 0.27        | 1.78        | 0.438   |
|                         |                                                                   |                                                             | 6 Weeks   | 0.58        | 0.27        | 1.25        | 0.163   |
|                         | Willing for surgery                                               | Adjusted for baseline difference in willingness for surgery | 12 Weeks  | 0.51        | 0.25        | 1.04        | 0.064   |
|                         |                                                                   |                                                             | 6 Months  | 0.81        | 0.41        | 1.63        | 0.561   |
|                         |                                                                   |                                                             | 6 Months  | 0.48        | 0.24        | 0.93        | 0.034   |
|                         |                                                                   |                                                             | 6 Months  | 0.51        | 0.27        | 0.94        | 0.032   |
| Treatment Preference    | Feels uncertain about treatment preference                        | Unadjusted                                                  | 6 Months  | 1.98        | 1.07        | 3.70        | 0.032   |
|                         | Prefers surgical treatment (if not uncertain about treatment)     |                                                             | 6 Months  | 0.49        | 0.24        | 0.97        | 0.044   |
|                         | Prefers non-surgical treatment (if not uncertain about treatment) |                                                             | 6 Months  | 0.49        | 0.24        | 0.97        | 0.044   |
| Treatment Preference    | Prefers surgical treatment (if not uncertain about treatment)     | Adjusted for baseline difference in willingness for surgery | 6 Months  | 0.58        | 0.27        | 1.20        | 0.153   |

Prefers non-surgical  
treatment (if not  
uncertain about  
treatment)

6 Months

1.74

0.83

3.67

0.153

## eMethods 2

This document provides a supplementary analysis of the randomized clinical trial data. The treatment effects of the tool have been provided as a risk difference. This is calculated using the “margins” command in R, which provides marginal effects summaries of logistic regression models. The specific method used involves deriving the average marginal effects, which are the mean of unit-specific partial derivatives of the regression equation with respect to each variable in the model for each unit in the data. In the context of logistic regression, these average marginal effects can be interpreted as risk differences.

The analyses have been performed for the original study cohort, HCF cohort (sensitivity analysis) and imputed dataset (sensitivity analysis). Both unadjusted and adjusted (for baseline willingness for surgery) analyses have been performed. Description of how the imputed dataset was created can be found in other supplementary documents.

Table. Average marginal effects (risk difference) for willingness for surgery across timepoints. Negative average marginal effects indicate a reduction in willingness for surgery for the tool group.

| <b>Cohort</b>         | <b>Adjustments in Analysis</b> | <b>Timepoint</b> | <b>Average Marginal Effects</b> | <b>95% CI</b>   | <b>P Value</b> |
|-----------------------|--------------------------------|------------------|---------------------------------|-----------------|----------------|
| Original study cohort | Unadjusted                     | Immediate        | -0.108                          | -0.238 - 0.022  | 0.103          |
|                       |                                | 6 Week           | -0.156                          | -0.299 - -0.011 | 0.035          |
|                       |                                | 12 Week          | -0.192                          | -0.336 - -0.048 | 0.009          |



|                                            |                                               |           |        |                 |       |
|--------------------------------------------|-----------------------------------------------|-----------|--------|-----------------|-------|
| Original study cohort                      | Adjusted for baseline willingness for surgery | 6 Month   | -0.096 | -0.238 - 0.047  | 0.188 |
|                                            |                                               | Immediate | -0.030 | -0.110 - 0.050  | 0.466 |
|                                            |                                               | 6 Week    | -0.076 | -0.188 - 0.036  | 0.184 |
|                                            |                                               | 12 Week   | -0.106 | -0.228 - 0.016  | 0.089 |
| HCF study site only (sensitivity analysis) | Unadjusted                                    | 6 Month   | -0.028 | -0.147 - 0.091  | 0.645 |
|                                            |                                               | Immediate | -0.109 | -0.250 - 0.032  | 0.129 |
|                                            |                                               | 6 Week    | 0.153  | -0.308 - 0.002  | 0.053 |
|                                            |                                               | 12 Week   | -0.187 | -0.342 - -0.032 | 0.018 |
| HCF study site only (sensitivity analysis) | Adjusted for baseline willingness for surgery | 6 Month   | -0.098 | -0.250 - 0.055  | 0.209 |
|                                            |                                               | Immediate | -0.033 | -0.123 - 0.057  | 0.476 |
|                                            |                                               | 6 Week    | -0.082 | -0.206 - 0.042  | 0.197 |
|                                            |                                               | 12 Week   | -0.105 | -0.240 - 0.029  | 0.124 |
| Imputed dataset (sensitivity analysis)     | Unadjusted                                    | 6 Month   | -0.031 | -0.160 - 0.098  | 0.640 |
|                                            |                                               | Immediate | -0.117 | -0.246 - 0.012  | 0.074 |
|                                            |                                               | 6 Week    | -0.156 | -0.287 - -0.025 | 0.020 |
|                                            |                                               | 12 Week   | -0.137 | -0.270 - -0.004 | 0.044 |
| Imputed dataset (sensitivity analysis)     | Adjusted for baseline willingness for surgery | 6 Month   | -0.080 | -0.214 - 0.054  | 0.240 |
|                                            |                                               | Immediate | -0.048 | -0.130 - 0.035  | 0.257 |
|                                            |                                               | 6 Week    | -0.095 | -0.194 - 0.005  | 0.063 |
|                                            |                                               | 12 Week   | -0.084 | -0.195 - 0.027  | 0.137 |
|                                            |                                               | 6 Month   | -0.026 | -0.135 - 0.084  | 0.646 |

### eMethods 3

This supplementary document provides a more comprehensive understanding of how the predictive tool generates reports for individuals.

#### Predictors

The tool generates a logistic regression model based on age, sex, and baseline symptoms (as per the Veterans-RAND 12 responses). Participants in the study input these variables as part of a baseline questionnaire. Both participants in the intervention and control group provide these predictive variables to the study database, but only those in the intervention (tool) group are provided a predictive report.

Table – Co-efficients of variables used in the final logistic regression model.

|                                          | <b>Coefficient</b> | <b>Standard Error</b> | <b>Confidence Interval (95%)</b> |        | <b>P Value</b> |
|------------------------------------------|--------------------|-----------------------|----------------------------------|--------|----------------|
| Intercept                                | 0.613              | 0.037                 | 0.541                            | 0.686  | <0.001         |
| Gender                                   | 0.13               | 0.037                 | 0.058                            | 0.203  | <0.001         |
| Utility Score Preop                      | -0.707             | 0.088                 | -0.88                            | -0.537 | <0.001         |
| VR12 General Health Preop                | -0.416             | 0.04                  | -0.495                           | -0.337 | <0.001         |
| VR12 Moderate Activities Preop           | -0.002             | 0.042                 | -0.083                           | 0.08   | 0.962          |
| VR12 Emotional Problems Less Preop       | -0.147             | 0.071                 | -0.286                           | -0.008 | 0.038          |
| VR12 Emotional Problems Limit Work Preop | 0.06               | 0.066                 | -0.069                           | 0.188  | 0.36           |
| VR12 Pain Interference Preop             | 0.224              | 0.051                 | 0.124                            | 0.323  | <0.001         |

|                              |        |       |        |        |       |
|------------------------------|--------|-------|--------|--------|-------|
| VR12 Social Activities Preop | 0.11   | 0.053 | 0.006  | 0.214  | 0.039 |
| Age (Category) 64-69         | 0.046  | 0.045 | -0.044 | 0.135  | 0.316 |
| Age (Category) 70-75         | -0.047 | 0.045 | -0.135 | 0.042  | 0.301 |
| Age (Category) 76-80         | -0.077 | 0.043 | -0.162 | 0.007  | 0.073 |
| Age (Category) 81+           | -0.121 | 0.04  | -0.199 | -0.042 | 0.003 |

### Deciles

The tool generates a probability score 0 (0% likelihood of improvement) to 1 (100% likelihood of improvement) based on the logistic regression model. The probability score is then assigned to a decile based on a range derived from SMART registry hold-out sample.

Table – Probability score ranges associated with each decile.

| Decile | Probability for Improvement (median; range) | Sample | Actual Outcome     |      |                       |      |
|--------|---------------------------------------------|--------|--------------------|------|-----------------------|------|
|        |                                             |        | Improvement (n; %) |      | No Improvement (n; %) |      |
| 1      | 0.338 (0.000 - 0.416)                       | 93     | 30                 | 32.3 | 63                    | 67.7 |
| 2      | 0.476 (0.417 - 0.510)                       | 93     | 35                 | 37.6 | 58                    | 62.4 |
| 3      | 0.548 (0.511 - 0.576)                       | 93     | 45                 | 48.4 | 48                    | 51.6 |
| 4      | 0.599 (0.577 - 0.623)                       | 93     | 59                 | 63.4 | 34                    | 36.6 |
| 5      | 0.642 (0.624 - 0.661)                       | 93     | 60                 | 64.5 | 33                    | 35.5 |

|           |                       |    |    |      |    |      |
|-----------|-----------------------|----|----|------|----|------|
| <b>6</b>  | 0.684 (0.662 - 0.698) | 93 | 66 | 71.0 | 27 | 29.0 |
| <b>7</b>  | 0.714 (0.699 - 0.735) | 92 | 68 | 73.9 | 24 | 26.1 |
| <b>8</b>  | 0.757 (0.736 - 0.774) | 92 | 70 | 76.1 | 22 | 23.9 |
| <b>9</b>  | 0.795 (0.775 - 0.819) | 92 | 76 | 82.6 | 16 | 17.4 |
| <b>10</b> | 0.854 (0.820 - 1.000) | 92 | 78 | 84.8 | 14 | 15.2 |

### Distributions

Histogram of probability scores are presented.

**eFigure 1.** Histogram of Probability Scores for the Treatment-as-Usual (TAU) Group

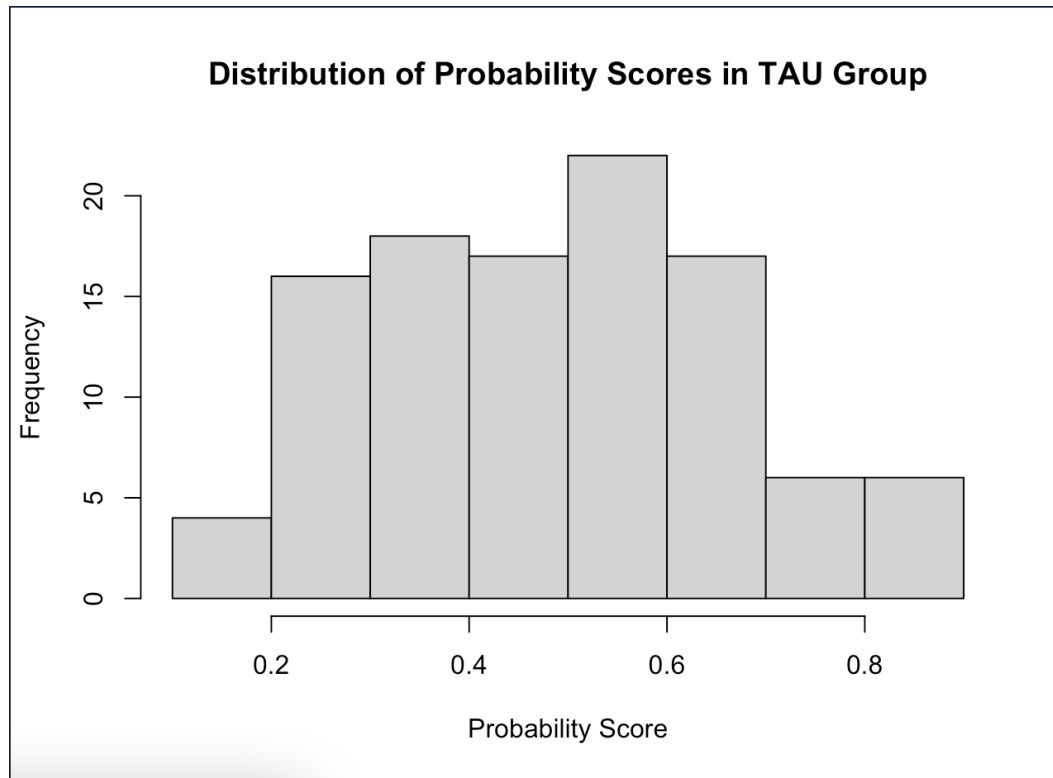

**eFigure 2.** Histogram of Probability Scores for the Tool Group

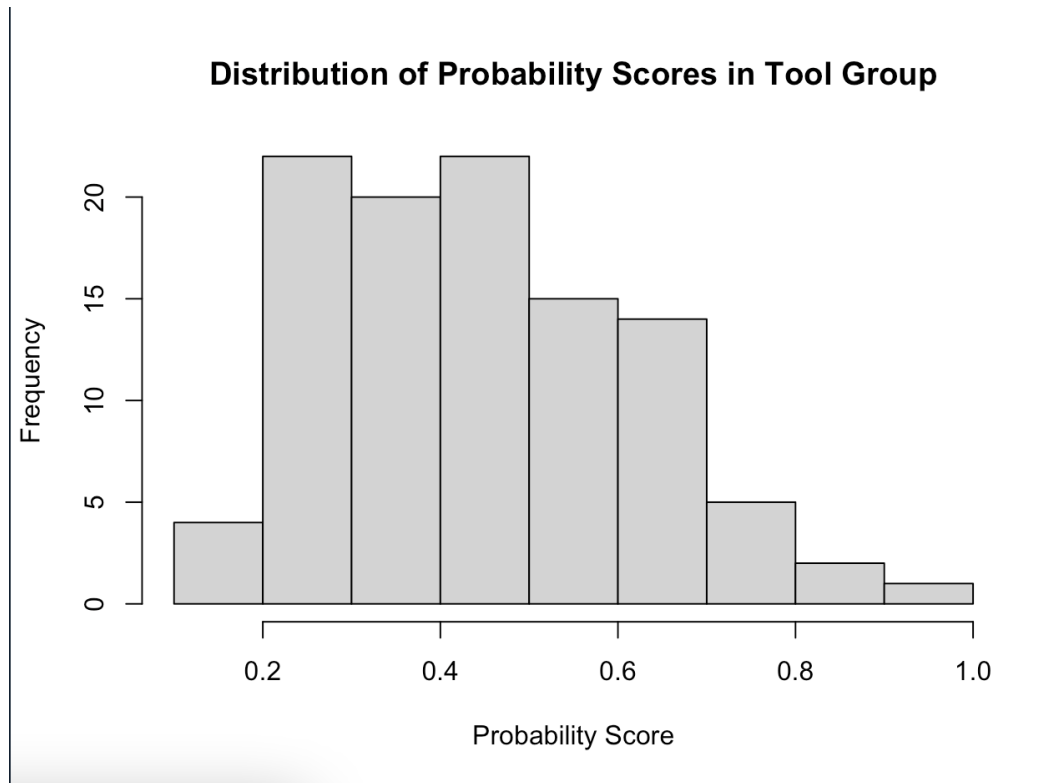

**eFigure 3.** Histogram of Probability Scores for the Overall (Whole) Cohort

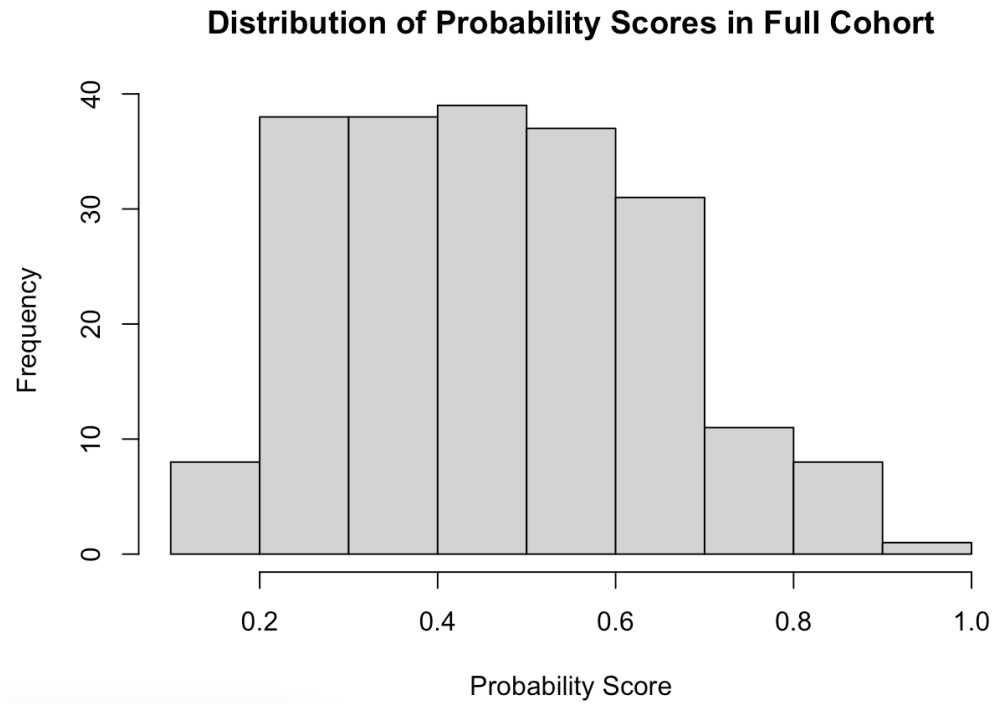

## Exemplar of the Predictive Tool Questionnaire

Screenshots of the questions used to generate the predictive outcome are attached.

# Questionnaire

1. Age

Age

---

2. Sex

Male

Female

These questions ask for your views about your health. This information will help keep track of how you feel and how well you are able to do your usual activities. If you are unsure how to answer a question, please give the best answer you can.

3. In general would you say your health is?

Poor

Fair

Good



Very good

Excellent

4. Does your health limit you in **moderate activities**, such as moving a table, pushing a vacuum cleaner, bowling, playing golf? If so, how much?"

No, not limited at all

Yes, limited a little

Yes, limited a lot

During the past 4 weeks, have you had any of the following problems with your work or other regular daily activities **as a result of your physical health?**

5. Such as being limited in the **kind** of work or other activities?

No, none of the time

Yes, a little of the time

Yes, some of the time

Yes, most of the time

Yes, all of the time

## Exemplar of the Predictive Outcome Report

Screenshot of the report provided to individuals are attached.

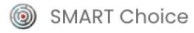

### What is SMART Choice?

The SMART Choice tool has been developed for patients who are considering a knee replacement. The tool uses simple questions about your age, sex and current symptoms to predict your likely outcome after knee replacement. The intention behind developing this tool was to support patients to make better informed decisions about their surgical care.

### Results

The SMART Choice Tool has calculated your likely outcome after total knee replacement.

Comparing your results with 100 other patients who are similar to you:

- 85 significantly improved
- 15 did not improve

at 12 months after knee replacement surgery.

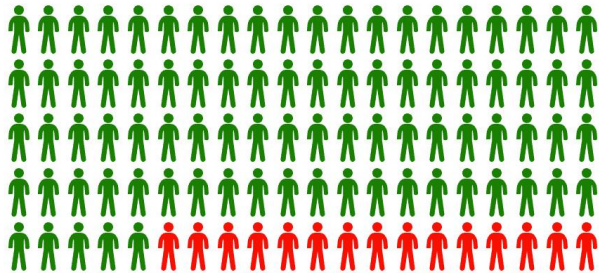

When ranked on your likelihood for improvement after surgery using deciles, **you have been placed in the 10th decile.**

For comparison, patients in the 1st decile have the lowest likelihood for improvement and patients in the 10th decile have the highest likelihood for improvement.

Note: As your circumstances change, your likely outcome after total knee replacement may change as well. Revisiting this tool in future may give you a different result. If you have any questions about your results today and/or total knee replacement, please discuss this with a qualified medical practitioner. For more information about the tool, please see the "Tool" section of the website.

**eTable 2.** Differences in Baseline Symptoms and Function by Recruitment Site

|                                                           | <b>HCF (Private)<br/>(N=188)</b> | <b>SVHM (Public)<br/>(N=23)</b> | <b>P-value</b> |
|-----------------------------------------------------------|----------------------------------|---------------------------------|----------------|
| <b>Time with Knee OA Symptoms (Years)</b>                 |                                  |                                 |                |
| Mean (SD)                                                 | 7.60 (6.36)                      | 8.52 (6.52)                     | 0.52           |
| <b>Required Non-Opioid Analgesia for Knee OA Symptoms</b> |                                  |                                 |                |
| Yes                                                       | 149 (79.3%)                      | 16 (69.6%)                      | 0.29           |
| No                                                        | 39 (20.7%)                       | 7 (30.4%)                       |                |
| <b>Required Opioid Analgesia for Knee OA Symptoms</b>     |                                  |                                 |                |
| Yes                                                       | 22 (11.7%)                       | 12 (52.2%)                      | <0.001         |
| No                                                        | 166 (88.3%)                      | 11 (47.8%)                      |                |
| <b>Reviewed by Physiotherapist</b>                        |                                  |                                 |                |
| Yes                                                       | 104 (55.3%)                      | 14 (60.9%)                      | 0.66           |
| No                                                        | 84 (44.7%)                       | 9 (39.1%)                       |                |
| <b>Reviewed by Orthopaedic Surgeon</b>                    |                                  |                                 |                |
| Yes                                                       | 142 (75.5%)                      | 23 (100%)                       | 0.01           |
| No                                                        | 46 (24.5%)                       | 0 (0%)                          |                |
| <b>Baseline Physical Component Score (VR12)</b>           |                                  |                                 |                |
| Mean (SD)                                                 | 36.1 (7.79)                      | 28.8 (6.43)                     | <0.001         |
| <b>Baseline Mental Component Score (VR12)</b>             |                                  |                                 |                |
| Mean (SD)                                                 | 52.5 (10.2)                      | 40.2 (11.6)                     | <0.001         |
| <b>Baseline Utility Score (VR12)</b>                      |                                  |                                 |                |
| Mean (SD)                                                 | 0.725 (0.126)                    | 0.550 (0.105)                   | <0.001         |
| <b>Predicted Outcome (Decile)</b>                         |                                  |                                 |                |
| 1-3 (Low likelihood for improvement)                      | 146 (77.7)                       | 7 (30.4%)                       | <0.001         |
| 4-6 (Medium likelihood for improvement)                   | 28 (14.9)                        | 9 (39.1%)                       |                |
| 7-10 (High likelihood for improvement)                    | 14 (7.4)                         | 7 (30.4%)                       |                |

*HCF: Hospital Contributions Fund; OA: osteoarthritis; SD: standard deviation; SVHM: St Vincent's Hospital, Melbourne; VR12: Veterans-Rand 12*
