# Supplementary material for: Predictive Tool Use and Willingness for Surgery in Patients With Knee Osteoarthritis: A Randomized Clinical Trial
Source: PubMed Central journal article supplement (PMC10924247; doi:10.1001/jamanetworkopen.2024.0890), 2024-03-08
Supplement: jamanetwopen-e240890-s003.pdf [file jamanetwopen-e240890-s003.pdf]

## Data Sharing Statement

Zhou. Predictive Tool Use and Willingness for Surgery in Patients With Knee Osteoarthritis. *JAMA Netw Open*. Published March 08, 2024. doi:10.1001/jamanetworkopen.2024.0890

### Data

**Data available:** No

### Additional Information

**Explanation for why data not available:** as part of ethical obligations, patient data is not available to be shared.
